# Supplementary material for: Stochastic generalization models learn to comprehensively detect volatile organic compounds associated with foodborne pathogens via Raman spectroscopy
Source: Royal Society of Chemistry journal article supplement (doi:10.1039/d4ra08316d), 2025-01-01
Supplement: d4ra08316d1.xlsx [file d4ra08316d1.xlsx]

## Sheet: Raw data
Wavenumber	Sample 1	Sample 2	Sample 3	Sample 4	Sample 5	Sample 6	Sample 7	Sample 8	ACN
-0.284	3.88	13.12	-5.25	-18.38	-6.62	49.62	8.5	-11.38	-6.75
6.124	15.88	7.12	13.75	-16.38	2.38	17.62	16.5	-10.38	-7.75
12.526	5.88	-0.88	8.75	-6.38	-6.62	15.62	-0.5	-3.38	2.25
18.923	7.88	-3.88	2.75	2.62	22.38	-1.38	1.5	-0.38	0.25
25.315	10.88	4.12	3.75	-0.38	9.38	8.62	4.5	-2.38	6.25
31.701	10.88	5.12	6.75	6.62	11.38	-6.38	2.5	8.62	9.25
38.082	2.88	1.12	2.75	2.62	1.38	-0.38	13.5	-4.38	17.25
44.457	4.88	-2.88	-1.25	6.62	8.38	5.62	11.5	9.62	3.25
50.827	18.88	6.12	8.75	6.62	6.38	1.62	2.5	2.62	17.25
57.192	15.88	-1.88	10.75	-9.38	5.38	2.62	6.5	-16.38	9.25
63.551	22.88	22.12	19.75	-7.38	4.38	-4.38	14.5	-2.38	19.25
69.905	12.88	10.12	0.75	-0.38	-0.62	17.62	0.5	7.62	15.25
76.254	20.88	20.12	12.75	-10.38	-8.62	1.62	14.5	-1.38	32.25
82.597	-1.12	0.12	3.75	-16.38	-4.62	6.62	11.5	-1.38	24.25
88.935	6.88	15.12	14.75	-3.38	10.38	16.62	6.5	-7.38	21.25
95.268	22.88	12.12	20.75	7.62	11.38	15.62	19.5	-1.38	42.25
101.595	0.88	11.12	2.75	3.62	9.38	9.62	23.5	11.62	37.25
107.917	21.88	8.12	14.75	6.62	5.38	32.62	22.5	11.62	26.25
114.234	28.88	23.12	32.75	7.62	15.38	32.62	24.5	3.62	55.25
120.545	43.88	37.12	61.75	23.62	37.38	65.62	56.5	27.62	103.25
126.851	107.88	103.12	117.75	57.62	64.38	107.62	121.5	43.62	228.25
133.152	196.88	157.12	233.75	107.62	146.38	218.62	261.5	98.62	554.25
139.448	375.88	335.12	423.75	224.62	262.38	403.62	496.5	199.62	1108.25
145.738	600.88	516.12	710.75	402.62	405.38	663.62	817.5	339.62	1928.25
152.023	836.88	744.12	1023.75	579.62	571.38	952.62	1112.5	507.62	2813.25
158.303	1060.88	941.12	1285.75	743.62	696.38	1348.62	1348.5	643.62	3507.25
164.578	1202.88	1092.12	1480.75	859.62	747.38	1744.62	1553.5	735.62	3896.25
170.847	1276.88	1128.12	1501.75	882.62	762.38	2117.62	1596.5	759.62	3947.25
177.111	1276.88	1112.12	1447.75	880.62	753.38	2286.62	1528.5	745.62	3630.25
183.37	1251.88	1087.12	1412.75	842.62	649.38	2217.62	1465.5	692.62	3314.25
189.624	1200.88	1042.12	1341.75	820.62	601.38	2052.62	1394.5	660.62	2880.25
195.872	1173.88	1033.12	1322.75	751.62	563.38	1857.62	1314.5	615.62	2605.25
202.116	1163.88	974.12	1253.75	732.62	504.38	1822.62	1209.5	591.62	2293.25
208.354	1150.88	958.12	1256.75	687.62	482.38	1757.62	1169.5	577.62	1993.25
214.587	1115.88	952.12	1196.75	646.62	437.38	1655.62	1105.5	548.62	1807.25
220.814	1095.88	906.12	1133.75	629.62	390.38	1444.62	1067.5	503.62	1581.25
227.037	1087.88	905.12	1140.75	597.62	381.38	1302.62	1027.5	487.62	1433.25
233.254	1101.88	896.12	1106.75	590.62	367.38	1241.62	979.5	510.62	1306.25
239.466	1105.88	903.12	1094.75	581.62	346.38	1171.62	974.5	498.62	1171.25
245.673	1093.88	893.12	1055.75	568.62	354.38	1167.62	982.5	527.62	1077.25
251.875	1086.88	865.12	1024.75	581.62	361.38	1202.62	922.5	550.62	1010.25
258.072	1087.88	860.12	1005.75	580.62	332.38	1270.62	933.5	564.62	959.25
264.263	1092.88	870.12	1005.75	563.62	314.38	1344.62	918.5	542.62	946.25
270.449	1105.88	858.12	976.75	536.62	346.38	1368.62	930.5	540.62	891.25
276.631	1094.88	845.12	964.75	562.62	318.38	1333.62	914.5	510.62	868.25
282.807	1073.88	837.12	975.75	546.62	301.38	1247.62	920.5	510.62	858.25
288.978	1100.88	865.12	973.75	556.62	320.38	1126.62	927.5	469.62	870.25
295.143	1091.88	832.12	992.75	572.62	324.38	1068.62	908.5	469.62	865.25
301.304	1032.88	845.12	972.75	588.62	322.38	1019.62	892.5	475.62	901.25
307.46	1152.88	899.12	1040.75	629.62	336.38	1019.62	994.5	470.62	922.25
313.61	1130.88	924.12	1065.75	677.62	349.38	989.62	986.5	516.62	991.25
319.756	1184.88	926.12	1099.75	687.62	346.38	1040.62	999.5	497.62	1110.25
325.896	1167.88	955.12	1110.75	747.62	345.38	1010.62	1028.5	517.62	1200.25
332.031	1197.88	958.12	1153.75	810.62	387.38	1024.62	1080.5	546.62	1390.25
338.162	1229.88	1009.12	1213.75	776.62	418.38	1043.62	1153.5	583.62	1641.25
344.287	1274.88	1026.12	1307.75	811.62	509.38	1099.62	1221.5	622.62	2095.25
350.407	1361.88	1121.12	1482.75	876.62	649.38	1195.62	1379.5	727.62	2864.25
356.522	1622.88	1409.12	1871.75	1108.62	918.38	1349.62	1779.5	933.62	4592.25
362.632	1972.88	1823.12	2489.75	1500.62	1353.38	1641.62	2377.5	1315.62	7597.25
368.736	2451.88	2269.12	3276.75	2008.62	1938.38	1960.62	3190.5	1803.62	11608.2
374.836	2670.88	2478.12	3654.75	2267.62	2244.38	2180.62	3610.5	2006.62	13882.2
380.931	2342.88	2162.12	3093.75	1964.62	1890.38	1938.62	3176.5	1731.62	11792.2
387.021	1866.88	1656.12	2210.75	1378.62	1197.38	1534.62	2321.5	1178.62	6936.25
393.106	1597.88	1318.12	1650.75	993.62	780.38	1345.62	1684.5	837.62	3823.25
399.185	1459.88	1170.12	1414.75	852.62	589.38	1219.62	1396.5	694.62	2453.25
405.26	1315.88	1024.12	1239.75	765.62	458.38	1139.62	1193.5	617.62	1795.25
411.33	1251.88	1004.12	1186.75	740.62	426.38	1102.62	1100.5	537.62	1422.25
417.395	1219.88	969.12	1145.75	735.62	384.38	1079.62	1082.5	515.62	1227.25
423.454	1202.88	918.12	1052.75	789.62	360.38	1060.62	1028.5	514.62	1043.25
429.509	1209.88	924.12	1089.75	750.62	342.38	1075.62	1042.5	505.62	879.25
435.559	1197.88	920.12	1017.75	700.62	317.38	1069.62	973.5	479.62	772.25
441.604	1172.88	924.12	1052.75	687.62	337.38	1066.62	1012.5	503.62	708.25
447.643	1212.88	932.12	1055.75	665.62	300.38	1146.62	998.5	478.62	634.25
453.678	1164.88	918.12	1048.75	662.62	290.38	1191.62	973.5	485.62	566.25
459.708	1198.88	912.12	1003.75	624.62	279.38	1322.62	975.5	471.62	534.25
465.733	1159.88	881.12	996.75	631.62	262.38	1638.62	927.5	421.62	470.25
471.753	1117.88	875.12	974.75	623.62	253.38	2454.62	915.5	433.62	458.25
477.768	1154.88	894.12	953.75	618.62	286.38	3429.62	907.5	430.62	415.25
483.778	1151.88	859.12	958.75	629.62	274.38	3704.62	922.5	418.62	381.25
489.783	1152.88	864.12	968.75	623.62	280.38	2568.62	924.5	457.62	377.25
495.784	1153.88	869.12	957.75	596.62	268.38	1475.62	929.5	440.62	328.25
501.779	1133.88	869.12	945.75	570.62	280.38	1144.62	911.5	420.62	343.25
507.769	1141.88	861.12	962.75	601.62	281.38	1075.62	933.5	431.62	333.25
513.755	1163.88	862.12	975.75	592.62	293.38	1070.62	941.5	432.62	330.25
519.735	1245.88	904.12	989.75	587.62	292.38	1060.62	947.5	412.62	332.25
525.711	1196.88	885.12	973.75	621.62	307.38	1075.62	952.5	456.62	359.25
531.682	1201.88	864.12	1002.75	581.62	315.38	1123.62	952.5	443.62	348.25
537.648	1206.88	835.12	965.75	604.62	316.38	1066.62	933.5	442.62	333.25
543.609	1193.88	857.12	948.75	618.62	363.38	1018.62	935.5	426.62	298.25
549.565	1181.88	853.12	937.75	611.62	302.38	990.62	941.5	428.62	293.25
555.516	1204.88	892.12	951.75	591.62	286.38	994.62	936.5	430.62	263.25
561.463	1190.88	873.12	938.75	615.62	303.38	951.62	959.5	429.62	249.25
567.404	1205.88	872.12	944.75	625.62	289.38	954.62	919.5	440.62	243.25
573.341	1196.88	901.12	945.75	626.62	290.38	964.62	945.5	430.62	262.25
579.273	1190.88	891.12	925.75	605.62	252.38	969.62	915.5	424.62	243.25
585.2	1239.88	902.12	967.75	636.62	309.38	951.62	926.5	430.62	246.25
591.122	1245.88	945.12	955.75	646.62	306.38	961.62	942.5	428.62	224.25
597.04	1253.88	922.12	955.75	647.62	319.38	972.62	950.5	454.62	240.25
602.952	1230.88	913.12	944.75	650.62	358.38	967.62	954.5	455.62	249.25
608.86	1233.88	921.12	972.75	642.62	316.38	970.62	972.5	463.62	235.25
614.763	1243.88	868.12	955.75	628.62	311.38	973.62	968.5	428.62	229.25
620.661	1256.88	909.12	979.75	664.62	285.38	993.62	989.5	440.62	242.25
626.554	1214.88	901.12	968.75	645.62	290.38	984.62	989.5	444.62	212.25
632.443	1217.88	865.12	968.75	630.62	316.38	1005.62	999.5	442.62	230.25
638.327	1208.88	912.12	984.75	646.62	295.38	990.62	1005.5	435.62	276.25
644.206	1223.88	918.12	990.75	673.62	314.38	998.62	1025.5	469.62	267.25
650.08	1242.88	913.12	996.75	653.62	313.38	1003.62	987.5	451.62	266.25
655.949	1237.88	892.12	974.75	701.62	319.38	1038.62	1004.5	447.62	279.25
661.814	1277.88	899.12	983.75	688.62	299.38	1042.62	993.5	470.62	271.25
667.674	1237.88	931.12	973.75	695.62	304.38	1059.62	992.5	450.62	273.25
673.529	1229.88	880.12	963.75	703.62	313.38	1206.62	964.5	454.62	256.25
679.379	1240.88	903.12	990.75	709.62	306.38	1491.62	994.5	463.62	228.25
685.225	1238.88	946.12	1003.75	714.62	288.38	1960.62	1013.5	451.62	251.25
691.066	1264.88	924.12	979.75	691.62	302.38	2238.62	1005.5	461.62	268.25
696.902	1269.88	936.12	1014.75	697.62	321.38	1879.62	1008.5	449.62	262.25
702.733	1275.88	931.12	1045.75	736.62	296.38	1348.62	1020.5	478.62	288.25
708.56	1327.88	944.12	1008.75	714.62	311.38	1123.62	1041.5	469.62	307.25
714.382	1305.88	952.12	1027.75	722.62	325.38	1089.62	1049.5	471.62	322.25
720.199	1331.88	967.12	1051.75	720.62	360.38	1075.62	1060.5	495.62	370.25
726.011	1341.88	1014.12	1087.75	700.62	356.38	1080.62	1105.5	506.62	473.25
731.819	1419.88	1049.12	1158.75	708.62	393.38	1107.62	1156.5	519.62	638.25
737.622	1400.88	1062.12	1192.75	740.62	409.38	1101.62	1184.5	562.62	902.25
743.421	1465.88	1108.12	1261.75	791.62	515.38	1172.62	1259.5	590.62	1115.25
749.215	1456.88	1086.12	1227.75	777.62	608.38	1112.62	1272.5	581.62	1137.25
755.004	1477.88	1059.12	1206.75	748.62	689.38	1109.62	1195.5	571.62	924.25
760.788	1449.88	1055.12	1171.75	734.62	605.38	1110.62	1149.5	562.62	709.25
766.568	1409.88	1041.12	1157.75	695.62	428.38	1087.62	1152.5	542.62	540.25
772.343	1391.88	1035.12	1137.75	686.62	375.38	1104.62	1123.5	543.62	416.25
778.113	1419.88	1043.12	1109.75	664.62	365.38	1073.62	1093.5	505.62	388.25
783.879	1431.88	1051.12	1127.75	699.62	344.38	1088.62	1087.5	516.62	341.25
789.64	1458.88	1087.12	1168.75	733.62	368.38	1150.62	1141.5	528.62	319.25
795.397	1523.88	1113.12	1247.75	760.62	352.38	1181.62	1211.5	567.62	317.25
801.148	1659.88	1251.12	1336.75	771.62	377.38	1326.62	1315.5	625.62	346.25
806.896	1716.88	1326.12	1381.75	793.62	388.38	1329.62	1356.5	660.62	350.25
812.638	1622.88	1215.12	1307.75	755.62	384.38	1288.62	1311.5	645.62	322.25
818.376	1521.88	1155.12	1240.75	737.62	360.38	1180.62	1177.5	607.62	300.25
824.109	1529.88	1149.12	1247.75	904.62	367.38	1179.62	1182.5	570.62	335.25
829.838	1597.88	1202.12	1295.75	1069.62	374.38	1221.62	1239.5	621.62	313.25
835.562	1650.88	1244.12	1388.75	1113.62	403.38	1305.62	1294.5	659.62	353.25
841.282	1616.88	1257.12	1419.75	978.62	376.38	1318.62	1299.5	651.62	356.25
846.996	1542.88	1163.12	1326.75	795.62	366.38	1204.62	1202.5	657.62	333.25
852.707	1512.88	1113.12	1246.75	738.62	341.38	1151.62	1163.5	629.62	350.25
858.412	1493.88	1094.12	1268.75	723.62	364.38	1192.62	1125.5	618.62	350.25
864.114	1472.88	1090.12	1240.75	751.62	370.38	1163.62	1134.5	649.62	367.25
869.81	1486.88	1124.12	1256.75	787.62	380.38	1170.62	1169.5	675.62	379.25
875.502	1505.88	1094.12	1309.75	789.62	385.38	1135.62	1146.5	634.62	423.25
881.189	1530.88	1140.12	1290.75	795.62	403.38	1175.62	1170.5	628.62	466.25
886.872	1555.88	1156.12	1331.75	789.62	417.38	1165.62	1235.5	667.62	547.25
892.551	1574.88	1179.12	1374.75	791.62	509.38	1208.62	1275.5	678.62	755.25
898.224	1652.88	1272.12	1463.75	867.62	555.38	1255.62	1378.5	713.62	1253.25
903.894	1816.88	1448.12	1794.75	1085.62	796.38	1411.62	1749.5	893.62	2890.25
909.558	2559.88	2226.12	3035.75	1792.62	1693.38	1940.62	2997.5	1608.62	8732.25
915.218	3540.88	3296.12	4756.75	2866.62	3006.38	2641.62	4742.5	2614.62	17570.2
920.874	3239.88	2988.12	4325.75	2723.62	2712.38	2426.62	4399.5	2482.62	16499.2
926.525	2193.88	1862.12	2522.75	1602.62	1419.38	1694.62	2552.5	1377.62	7271.25
932.171	1706.88	1334.12	1609.75	974.62	654.38	1343.62	1585.5	816.62	2333.25
937.813	1609.88	1197.12	1350.75	813.62	467.38	1285.62	1372.5	635.62	973.25
943.451	1577.88	1169.12	1273.75	776.62	418.38	1303.62	1341.5	615.62	639.25
949.084	1584.88	1150.12	1288.75	807.62	413.38	1317.62	1278.5	619.62	536.25
954.713	1575.88	1155.12	1279.75	867.62	381.38	1337.62	1251.5	636.62	474.25
960.337	1621.88	1189.12	1273.75	919.62	413.38	1333.62	1293.5	640.62	442.25
965.956	1694.88	1267.12	1337.75	884.62	415.38	1323.62	1365.5	642.62	460.25
971.571	1667.88	1274.12	1312.75	827.62	443.38	1338.62	1418.5	626.62	447.25
977.182	1607.88	1208.12	1299.75	777.62	411.38	1244.62	1346.5	607.62	430.25
982.788	1579.88	1152.12	1239.75	733.62	404.38	1208.62	1291.5	574.62	441.25
988.389	1638.88	1184.12	1297.75	717.62	426.38	1246.62	1358.5	608.62	431.25
993.986	1690.88	1257.12	1367.75	716.62	476.38	1301.62	1432.5	656.62	449.25
999.579	1735.88	1301.12	1448.75	728.62	499.38	1313.62	1538.5	624.62	439.25
1005.17	1689.88	1198.12	1400.75	706.62	577.38	1257.62	1521.5	624.62	474.25
1010.75	1590.88	1177.12	1360.75	710.62	573.38	1239.62	1564.5	624.62	467.25
1016.33	1626.88	1190.12	1364.75	702.62	505.38	1209.62	1679.5	657.62	530.25
1021.9	1658.88	1192.12	1393.75	700.62	444.38	1284.62	1950.5	662.62	566.25
1027.48	1705.88	1273.12	1486.75	710.62	468.38	1315.62	2143.5	673.62	624.25
1033.04	1759.88	1288.12	1485.75	747.62	472.38	1351.62	2097.5	742.62	705.25
1038.6	1782.88	1298.12	1481.75	736.62	475.38	1351.62	1910.5	737.62	746.25
1044.16	1716.88	1289.12	1442.75	727.62	452.38	1293.62	1643.5	703.62	720.25
1049.71	1710.88	1283.12	1433.75	702.62	446.38	1267.62	1494.5	711.62	638.25
1055.26	1715.88	1250.12	1483.75	702.62	513.38	1285.62	1429.5	727.62	524.25
1060.81	1703.88	1268.12	1475.75	698.62	572.38	1239.62	1410.5	735.62	514.25
1066.35	1688.88	1268.12	1469.75	703.62	563.38	1240.62	1378.5	726.62	444.25
1071.88	1730.88	1297.12	1506.75	691.62	467.38	1215.62	1399.5	708.62	418.25
1077.41	1691.88	1292.12	1534.75	703.62	434.38	1233.62	1345.5	703.62	423.25
1082.94	1710.88	1251.12	1526.75	682.62	406.38	1241.62	1423.5	678.62	424.25
1088.46	1631.88	1219.12	1427.75	721.62	412.38	1244.62	1398.5	675.62	387.25
1093.98	1660.88	1192.12	1367.75	709.62	429.38	1253.62	1459.5	630.62	378.25
1099.49	1674.88	1204.12	1308.75	723.62	408.38	1231.62	1441.5	608.62	382.25
1105	1680.88	1189.12	1278.75	737.62	430.38	1268.62	1397.5	609.62	338.25
1110.5	1693.88	1200.12	1305.75	756.62	465.38	1242.62	1404.5	643.62	362.25
1116	1711.88	1248.12	1340.75	791.62	479.38	1280.62	1367.5	673.62	381.25
1121.5	1704.88	1252.12	1395.75	770.62	458.38	1303.62	1338.5	651.62	336.25
1126.99	1660.88	1231.12	1356.75	752.62	429.38	1299.62	1365.5	632.62	348.25
1132.48	1663.88	1234.12	1329.75	741.62	419.38	1301.62	1367.5	626.62	334.25
1137.96	1771.88	1252.12	1374.75	714.62	440.38	1329.62	1410.5	618.62	330.25
1143.44	1807.88	1338.12	1426.75	749.62	453.38	1428.62	1524.5	646.62	348.25
1148.91	1947.88	1474.12	1539.75	779.62	466.38	1541.62	1652.5	695.62	379.25
1154.38	1907.88	1440.12	1510.75	805.62	479.38	1548.62	1647.5	672.62	368.25
1159.85	1910.88	1436.12	1483.75	776.62	441.38	1490.62	1591.5	667.62	388.25
1165.31	1896.88	1393.12	1473.75	813.62	439.38	1446.62	1603.5	658.62	369.25
1170.77	1848.88	1336.12	1415.75	778.62	442.38	1423.62	1528.5	630.62	365.25
1176.22	1759.88	1285.12	1325.75	753.62	425.38	1373.62	1407.5	598.62	317.25
1181.67	1735.88	1255.12	1315.75	742.62	397.38	1342.62	1383.5	601.62	317.25
1187.11	1714.88	1192.12	1263.75	695.62	439.38	1317.62	1374.5	582.62	298.25
1192.55	1724.88	1201.12	1299.75	703.62	443.38	1340.62	1372.5	591.62	314.25
1197.99	1736.88	1235.12	1303.75	731.62	418.38	1323.62	1393.5	602.62	338.25
1203.42	1739.88	1238.12	1318.75	701.62	446.38	1348.62	1414.5	608.62	331.25
1208.85	1776.88	1265.12	1364.75	710.62	447.38	1375.62	1440.5	612.62	322.25
1214.27	1819.88	1294.12	1393.75	743.62	472.38	1413.62	1500.5	613.62	331.25
1219.69	1801.88	1311.12	1366.75	716.62	461.38	1448.62	1474.5	599.62	336.25
1225.1	1790.88	1293.12	1356.75	749.62	422.38	1383.62	1423.5	629.62	332.25
1230.51	1776.88	1247.12	1323.75	722.62	458.38	1401.62	1373.5	612.62	340.25
1235.92	1734.88	1238.12	1288.75	714.62	455.38	1364.62	1400.5	620.62	318.25
1241.32	1775.88	1272.12	1330.75	706.62	474.38	1378.62	1414.5	604.62	353.25
1246.71	1764.88	1265.12	1337.75	707.62	467.38	1382.62	1415.5	623.62	376.25
1252.11	1749.88	1256.12	1323.75	697.62	473.38	1454.62	1431.5	627.62	385.25
1257.49	1813.88	1328.12	1377.75	702.62	471.38	1464.62	1444.5	632.62	408.25
1262.88	1803.88	1288.12	1369.75	710.62	476.38	1408.62	1415.5	634.62	426.25
1268.26	1825.88	1305.12	1376.75	703.62	503.38	1467.62	1443.5	655.62	454.25
1273.64	1831.88	1306.12	1436.75	718.62	528.38	1463.62	1473.5	691.62	501.25
1279.01	1934.88	1388.12	1509.75	723.62	548.38	1479.62	1518.5	703.62	574.25
1284.38	1947.88	1426.12	1606.75	748.62	550.38	1484.62	1534.5	743.62	565.25
1289.74	1998.88	1475.12	1718.75	745.62	513.38	1510.62	1566.5	804.62	669.25
1295.1	2049.88	1551.12	1842.75	760.62	529.38	1526.62	1563.5	893.62	686.25
1300.45	2061.88	1600.12	1907.75	781.62	522.38	1548.62	1592.5	920.62	740.25
1305.8	2124.88	1604.12	1874.75	764.62	556.38	1582.62	1634.5	877.62	811.25
1311.15	2080.88	1543.12	1813.75	805.62	560.38	1608.62	1656.5	870.62	892.25
1316.49	2106.88	1605.12	1803.75	844.62	593.38	1643.62	1741.5	818.62	995.25
1321.83	2180.88	1674.12	1859.75	903.62	646.38	1735.62	1878.5	861.62	1136.25
1327.16	2385.88	1811.12	1953.75	974.62	724.38	1848.62	2033.5	877.62	1253.25
1332.49	2277.88	1734.12	1884.75	1013.62	823.38	1830.62	2041.5	873.62	1385.25
1337.82	2153.88	1608.12	1766.75	1022.62	826.38	1653.62	1906.5	857.62	1502.25
1343.14	2133.88	1596.12	1759.75	983.62	770.38	1621.62	1866.5	805.62	1690.25
1348.46	2184.88	1631.12	1869.75	1001.62	845.38	1691.62	1928.5	864.62	1883.25
1353.77	2248.88	1715.12	1952.75	1035.62	899.38	1791.62	2097.5	946.62	2414.25
1359.08	2405.88	1872.12	2192.75	1138.62	1039.38	1893.62	2324.5	1051.62	3431.25
1364.38	2638.88	2078.12	2581.75	1420.62	1277.38	2062.62	2728.5	1287.62	5421.25
1369.69	2928.88	2433.12	3183.75	1804.62	1707.38	2331.62	3285.5	1709.62	8600.25
1374.98	3063.88	2560.12	3368.75	1941.62	1884.38	2375.62	3609.5	1824.62	9818.25
1380.28	2772.88	2246.12	2859.75	1652.62	1550.38	2162.62	3090.5	1519.62	7671.25
1385.56	2490.88	1981.12	2418.75	1374.62	1221.38	1900.62	2608.5	1236.62	5432.25
1390.85	2409.88	1846.12	2230.75	1221.62	1083.38	1843.62	2370.5	1099.62	4397.25
1396.13	2365.88	1799.12	2161.75	1158.62	1017.38	1833.62	2321.5	1060.62	4032.25
1401.4	2409.88	1821.12	2150.75	1174.62	1047.38	1836.62	2315.5	1094.62	4036.25
1406.68	2429.88	1894.12	2203.75	1232.62	1032.38	1891.62	2351.5	1121.62	4146.25
1411.94	2453.88	1886.12	2190.75	1223.62	1086.38	1927.62	2390.5	1123.62	4163.25
1417.21	2499.88	1967.12	2266.75	1255.62	1129.38	2006.62	2446.5	1144.62	4182.25
1422.47	2517.88	1957.12	2316.75	1263.62	1116.38	1992.62	2426.5	1196.62	4239.25
1427.72	2634.88	2093.12	2533.75	1280.62	1113.38	2080.62	2547.5	1269.62	4242.25
1432.97	2818.88	2312.12	2893.75	1374.62	1136.38	2150.62	2688.5	1458.62	4481.25
1438.22	2962.88	2442.12	3106.75	1449.62	1178.38	2179.62	2865.5	1571.62	4730.25
1443.46	2999.88	2485.12	3097.75	1519.62	1178.38	2164.62	2978.5	1625.62	4847.25
1448.7	3055.88	2572.12	3177.75	1576.62	1208.38	2247.62	3087.5	1605.62	4841.25
1453.94	3209.88	2658.12	3232.75	1626.62	1227.38	2326.62	3263.5	1620.62	4579.25
1459.17	3143.88	2540.12	3091.75	1570.62	1187.38	2331.62	3171.5	1530.62	4151.25
1464.4	2859.88	2290.12	2725.75	1462.62	1055.38	2138.62	2896.5	1376.62	3577.25
1469.62	2566.88	1985.12	2382.75	1264.62	923.38	1900.62	2585.5	1183.62	3105.25
1474.84	2405.88	1834.12	2197.75	1115.62	881.38	1814.62	2435.5	1095.62	2783.25
1480.05	2294.88	1724.12	2060.75	1016.62	808.38	1773.62	2298.5	1002.62	2513.25
1485.27	2296.88	1696.12	1951.75	916.62	807.38	1757.62	2212.5	951.62	2300.25
1490.47	2213.88	1616.12	1830.75	907.62	805.38	1775.62	2072.5	887.62	2106.25
1495.67	2160.88	1567.12	1720.75	880.62	784.38	1728.62	2064.5	864.62	1981.25
1500.87	2166.88	1534.12	1718.75	844.62	879.38	1727.62	1933.5	824.62	1924.25
1506.07	2152.88	1551.12	1751.75	851.62	1059.38	1714.62	1948.5	803.62	1824.25
1511.26	2098.88	1530.12	1689.75	828.62	1107.38	1706.62	1915.5	826.62	1784.25
1516.45	2153.88	1548.12	1719.75	851.62	921.38	1660.62	1941.5	804.62	1716.25
1521.63	2146.88	1525.12	1676.75	805.62	780.38	1642.62	1879.5	801.62	1664.25
1526.81	2151.88	1517.12	1716.75	803.62	702.38	1663.62	1934.5	781.62	1595.25
1531.98	2135.88	1518.12	1670.75	776.62	681.38	1639.62	1865.5	762.62	1491.25
1537.15	2108.88	1481.12	1611.75	773.62	669.38	1639.62	1859.5	768.62	1389.25
1542.32	2118.88	1478.12	1614.75	786.62	628.38	1628.62	1853.5	743.62	1396.25
1547.48	2091.88	1510.12	1606.75	770.62	624.38	1639.62	1806.5	727.62	1275.25
1552.64	2077.88	1441.12	1568.75	746.62	604.38	1615.62	1786.5	712.62	1235.25
1557.8	2046.88	1471.12	1595.75	730.62	585.38	1593.62	1769.5	722.62	1139.25
1562.95	2059.88	1454.12	1560.75	730.62	614.38	1604.62	1782.5	719.62	1096.25
1568.09	2092.88	1412.12	1531.75	732.62	566.38	1610.62	1771.5	675.62	1007.25
1573.24	2062.88	1439.12	1497.75	682.62	577.38	1582.62	1740.5	671.62	919.25
1578.38	2039.88	1434.12	1497.75	702.62	648.38	1575.62	1698.5	701.62	857.25
1583.51	2049.88	1412.12	1497.75	702.62	562.38	1652.62	1757.5	664.62	790.25
1588.64	2068.88	1425.12	1498.75	699.62	526.38	1600.62	1734.5	665.62	764.25
1593.77	2032.88	1426.12	1490.75	679.62	536.38	1625.62	1684.5	674.62	702.25
1598.89	2081.88	1416.12	1490.75	680.62	550.38	1672.62	1677.5	677.62	642.25
1604.01	2069.88	1433.12	1462.75	664.62	545.38	1651.62	1661.5	681.62	589.25
1609.13	2080.88	1452.12	1498.75	680.62	551.38	1657.62	1653.5	665.62	570.25
1614.24	2051.88	1408.12	1444.75	679.62	567.38	1641.62	1627.5	663.62	538.25
1619.34	2060.88	1391.12	1465.75	667.62	547.38	1618.62	1676.5	631.62	501.25
1624.45	2038.88	1404.12	1399.75	668.62	522.38	1616.62	1648.5	652.62	487.25
1629.55	2031.88	1421.12	1436.75	664.62	520.38	1607.62	1625.5	637.62	456.25
1634.64	2047.88	1404.12	1439.75	669.62	497.38	1609.62	1636.5	627.62	431.25
1639.73	2082.88	1433.12	1463.75	676.62	508.38	1636.62	1601.5	646.62	407.25
1644.82	2055.88	1423.12	1447.75	679.62	504.38	1611.62	1595.5	605.62	400.25
1649.91	2053.88	1427.12	1441.75	711.62	484.38	1626.62	1608.5	624.62	383.25
1654.99	2054.88	1386.12	1435.75	715.62	516.38	1624.62	1621.5	640.62	377.25
1660.06	2063.88	1432.12	1467.75	717.62	496.38	1608.62	1598.5	613.62	363.25
1665.13	2083.88	1435.12	1465.75	692.62	527.38	1607.62	1631.5	652.62	358.25
1670.2	2114.88	1451.12	1450.75	697.62	489.38	1591.62	1629.5	643.62	350.25
1675.27	2087.88	1403.12	1425.75	702.62	490.38	1618.62	1591.5	655.62	350.25
1680.33	2085.88	1412.12	1426.75	704.62	504.38	1581.62	1623.5	648.62	329.25
1685.38	2061.88	1392.12	1419.75	671.62	518.38	1590.62	1591.5	635.62	346.25
1690.44	2083.88	1413.12	1436.75	686.62	532.38	1619.62	1651.5	618.62	314.25
1695.49	2083.88	1414.12	1442.75	661.62	493.38	1581.62	1621.5	617.62	320.25
1700.53	2118.88	1432.12	1426.75	672.62	524.38	1582.62	1591.5	625.62	343.25
1705.57	2168.88	1478.12	1445.75	682.62	506.38	1588.62	1630.5	634.62	309.25
1710.61	2254.88	1552.12	1440.75	696.62	502.38	1592.62	1638.5	642.62	331.25
1715.64	2282.88	1587.12	1476.75	690.62	494.38	1597.62	1660.5	614.62	327.25
1720.67	2166.88	1493.12	1435.75	696.62	518.38	1584.62	1652.5	615.62	298.25
1725.7	2149.88	1432.12	1431.75	721.62	521.38	1554.62	1630.5	625.62	321.25
1730.72	2086.88	1401.12	1437.75	776.62	511.38	1605.62	1595.5	642.62	379.25
1735.74	2105.88	1419.12	1464.75	776.62	546.38	1580.62	1601.5	621.62	365.25
1740.75	2069.88	1384.12	1421.75	759.62	513.38	1604.62	1594.5	620.62	345.25
1745.77	2065.88	1403.12	1415.75	728.62	504.38	1609.62	1597.5	648.62	329.25
1750.77	2111.88	1417.12	1418.75	692.62	534.38	1610.62	1648.5	627.62	338.25
1755.77	2067.88	1428.12	1449.75	669.62	518.38	1619.62	1566.5	628.62	344.25
1760.77	2104.88	1406.12	1473.75	657.62	494.38	1609.62	1602.5	620.62	360.25
1765.77	2110.88	1407.12	1469.75	624.62	513.38	1620.62	1607.5	610.62	330.25
1770.76	2074.88	1428.12	1464.75	653.62	504.38	1619.62	1607.5	632.62	305.25
1775.75	2110.88	1428.12	1456.75	617.62	516.38	1621.62	1647.5	622.62	328.25
1780.73	2102.88	1437.12	1462.75	629.62	496.38	1629.62	1624.5	636.62	336.25
1785.71	2093.88	1400.12	1442.75	637.62	507.38	1645.62	1649.5	662.62	363.25
1790.69	2079.88	1400.12	1476.75	625.62	552.38	1639.62	1595.5	656.62	365.25
1795.66	2124.88	1456.12	1485.75	620.62	497.38	1612.62	1648.5	657.62	345.25
1800.63	2126.88	1434.12	1461.75	634.62	526.38	1632.62	1656.5	659.62	361.25
1805.59	2131.88	1431.12	1490.75	618.62	522.38	1628.62	1662.5	641.62	364.25
1810.56	2140.88	1416.12	1465.75	616.62	551.38	1691.62	1676.5	612.62	372.25
1815.51	2124.88	1419.12	1473.75	614.62	536.38	1673.62	1649.5	636.62	422.25
1820.47	2174.88	1477.12	1479.75	640.62	581.38	1657.62	1686.5	667.62	433.25
1825.42	2169.88	1439.12	1505.75	633.62	565.38	1722.62	1683.5	636.62	491.25
1830.36	2126.88	1423.12	1439.75	596.62	566.38	1722.62	1635.5	644.62	464.25
1835.31	2118.88	1382.12	1392.75	595.62	526.38	1799.62	1585.5	606.62	436.25
1840.24	2112.88	1376.12	1406.75	593.62	549.38	1821.62	1624.5	609.62	381.25
1845.18	2104.88	1387.12	1404.75	576.62	494.38	1813.62	1570.5	603.62	379.25
1850.11	2121.88	1397.12	1375.75	570.62	529.38	1811.62	1567.5	586.62	329.25
1855.04	2092.88	1378.12	1425.75	571.62	548.38	1755.62	1620.5	606.62	317.25
1859.96	2132.88	1400.12	1434.75	560.62	526.38	1753.62	1631.5	625.62	314.25
1864.88	2135.88	1398.12	1439.75	615.62	556.38	1735.62	1632.5	634.62	338.25
1869.8	2124.88	1402.12	1427.75	603.62	531.38	1663.62	1620.5	659.62	324.25
1874.71	2127.88	1468.12	1487.75	591.62	545.38	1653.62	1681.5	644.62	315.25
1879.62	2145.88	1419.12	1475.75	603.62	520.38	1659.62	1664.5	633.62	299.25
1884.52	2138.88	1418.12	1501.75	590.62	519.38	1715.62	1665.5	643.62	275.25
1889.42	2109.88	1425.12	1474.75	616.62	504.38	1701.62	1642.5	651.62	298.25
1894.32	2155.88	1400.12	1469.75	601.62	527.38	1659.62	1607.5	651.62	302.25
1899.22	2152.88	1424.12	1437.75	593.62	532.38	1692.62	1652.5	644.62	302.25
1904.11	2100.88	1447.12	1455.75	589.62	543.38	1673.62	1658.5	616.62	305.25
1908.99	2094.88	1423.12	1445.75	606.62	521.38	1726.62	1631.5	637.62	285.25
1913.88	2124.88	1397.12	1467.75	601.62	519.38	1704.62	1660.5	630.62	274.25
1918.76	2145.88	1433.12	1441.75	568.62	509.38	1699.62	1640.5	623.62	275.25
1923.63	2134.88	1426.12	1470.75	601.62	527.38	1716.62	1668.5	647.62	296.25
1928.5	2179.88	1417.12	1446.75	604.62	498.38	1719.62	1666.5	657.62	290.25
1933.37	2195.88	1471.12	1477.75	614.62	532.38	1730.62	1663.5	637.62	283.25
1938.23	2149.88	1419.12	1439.75	582.62	512.38	1684.62	1601.5	631.62	320.25
1943.1	2153.88	1417.12	1437.75	604.62	526.38	1735.62	1643.5	630.62	314.25
1947.95	2211.88	1437.12	1450.75	578.62	493.38	1741.62	1676.5	660.62	280.25
1952.81	2172.88	1432.12	1449.75	570.62	556.38	1728.62	1651.5	636.62	266.25
1957.66	2181.88	1482.12	1473.75	587.62	553.38	1745.62	1669.5	650.62	260.25
1962.5	2222.88	1452.12	1455.75	599.62	541.38	1742.62	1658.5	655.62	277.25
1967.35	2162.88	1453.12	1477.75	585.62	582.38	1754.62	1680.5	636.62	297.25
1972.18	2194.88	1455.12	1483.75	598.62	557.38	1731.62	1672.5	657.62	277.25
1977.02	2168.88	1462.12	1474.75	582.62	543.38	1716.62	1698.5	655.62	282.25
1981.85	2181.88	1439.12	1475.75	614.62	564.38	1726.62	1702.5	664.62	293.25
1986.68	2188.88	1446.12	1499.75	580.62	539.38	1740.62	1706.5	653.62	277.25
1991.5	2237.88	1486.12	1473.75	585.62	533.38	1710.62	1722.5	663.62	269.25
1996.33	2206.88	1468.12	1494.75	595.62	548.38	1746.62	1662.5	636.62	281.25
2001.14	2239.88	1496.12	1511.75	612.62	557.38	1757.62	1694.5	647.62	279.25
2005.95	2203.88	1476.12	1529.75	594.62	518.38	1771.62	1695.5	654.62	306.25
2010.77	2210.88	1460.12	1493.75	602.62	564.38	1722.62	1707.5	638.62	261.25
2015.57	2207.88	1479.12	1515.75	602.62	589.38	1722.62	1745.5	652.62	280.25
2020.37	2241.88	1461.12	1509.75	591.62	522.38	1781.62	1725.5	651.62	275.25
2025.17	2229.88	1436.12	1538.75	591.62	562.38	1738.62	1702.5	651.62	272.25
2029.97	2237.88	1480.12	1537.75	582.62	552.38	1768.62	1730.5	664.62	288.25
2034.76	2229.88	1452.12	1518.75	583.62	561.38	1732.62	1749.5	664.62	270.25
2039.55	2223.88	1501.12	1550.75	595.62	558.38	1722.62	1704.5	655.62	295.25
2044.33	2229.88	1480.12	1491.75	587.62	539.38	1727.62	1721.5	641.62	280.25
2049.11	2219.88	1471.12	1490.75	604.62	540.38	1734.62	1691.5	657.62	300.25
2053.89	2237.88	1469.12	1556.75	589.62	523.38	1740.62	1736.5	646.62	286.25
2058.67	2237.88	1458.12	1502.75	591.62	564.38	1748.62	1718.5	691.62	322.25
2063.44	2273.88	1469.12	1533.75	579.62	571.38	1722.62	1744.5	650.62	313.25
2068.2	2262.88	1463.12	1514.75	595.62	562.38	1742.62	1733.5	663.62	329.25
2072.97	2295.88	1515.12	1528.75	584.62	551.38	1725.62	1781.5	648.62	316.25
2077.73	2219.88	1468.12	1500.75	599.62	562.38	1721.62	1732.5	694.62	335.25
2082.48	2245.88	1494.12	1500.75	603.62	553.38	1748.62	1717.5	666.62	338.25
2087.24	2252.88	1489.12	1540.75	580.62	540.38	1769.62	1716.5	651.62	298.25
2091.98	2298.88	1488.12	1536.75	599.62	559.38	1771.62	1752.5	645.62	324.25
2096.73	2274.88	1514.12	1554.75	596.62	563.38	1765.62	1733.5	662.62	318.25
2101.47	2285.88	1477.12	1520.75	612.62	547.38	1778.62	1734.5	661.62	298.25
2106.21	2283.88	1526.12	1551.75	614.62	559.38	1785.62	1756.5	673.62	334.25
2110.95	2285.88	1530.12	1541.75	601.62	579.38	1804.62	1753.5	675.62	330.25
2115.68	2310.88	1514.12	1578.75	580.62	565.38	1788.62	1729.5	648.62	341.25
2120.4	2304.88	1519.12	1580.75	590.62	583.38	1780.62	1749.5	667.62	352.25
2125.13	2319.88	1512.12	1559.75	598.62	577.38	1820.62	1738.5	658.62	340.25
2129.85	2312.88	1535.12	1528.75	599.62	598.38	1854.62	1806.5	676.62	381.25
2134.57	2269.88	1509.12	1521.75	573.62	580.38	1860.62	1753.5	645.62	327.25
2139.28	2278.88	1537.12	1551.75	584.62	585.38	1885.62	1760.5	668.62	411.25
2143.99	2306.88	1502.12	1537.75	531.62	619.38	1926.62	1779.5	632.62	430.25
2148.7	2317.88	1491.12	1495.75	605.62	545.38	1932.62	1700.5	662.62	411.25
2153.4	2264.88	1461.12	1477.75	578.62	570.38	1963.62	1754.5	674.62	456.25
2158.1	2349.88	1515.12	1565.75	597.62	602.38	1957.62	1775.5	678.62	474.25
2162.8	2279.88	1546.12	1510.75	573.62	603.38	1968.62	1747.5	681.62	488.25
2167.49	2355.88	1541.12	1601.75	610.62	615.38	1884.62	1834.5	701.62	525.25
2172.18	2343.88	1538.12	1609.75	620.62	606.38	1897.62	1856.5	710.62	573.25
2176.86	2376.88	1566.12	1640.75	612.62	627.38	1909.62	1822.5	719.62	633.25
2181.55	2383.88	1597.12	1647.75	630.62	656.38	1909.62	1867.5	698.62	697.25
2186.23	2396.88	1580.12	1677.75	641.62	660.38	1878.62	1896.5	768.62	729.25
2190.9	2388.88	1592.12	1695.75	667.62	678.38	1916.62	1910.5	755.62	906.25
2195.57	2466.88	1655.12	1775.75	702.62	665.38	1918.62	1942.5	790.62	1151.25
2200.24	2443.88	1703.12	1842.75	752.62	749.38	1978.62	2068.5	810.62	1656.25
2204.91	2547.88	1717.12	1929.75	818.62	838.38	1995.62	2154.5	905.62	2105.25
2209.57	2484.88	1734.12	1859.75	781.62	785.38	1998.62	2079.5	847.62	1740.25
2214.23	2464.88	1649.12	1791.75	719.62	738.38	1960.62	2030.5	813.62	1404.25
2218.88	2499.88	1697.12	1834.75	761.62	734.38	1983.62	2047.5	803.62	1531.25
2223.53	2499.88	1735.12	1856.75	792.62	812.38	2047.62	2113.5	851.62	1931.25
2228.18	2641.88	1806.12	2015.75	875.62	927.38	2035.62	2273.5	960.62	2502.25
2232.82	2748.88	1910.12	2244.75	985.62	1040.38	2158.62	2463.5	1053.62	3465.25
2237.46	3040.88	2294.12	2746.75	1315.62	1486.38	2414.62	2982.5	1383.62	6178.25
2242.1	4066.88	3311.12	4494.75	2334.62	2768.38	3262.62	4545.5	2359.62	14907.2
2246.74	6846.88	6273.12	9197.75	5180.62	6339.38	5361.62	9004.5	5096.62	39054.2
2251.37	11394.9	11318.1	17176.8	10059.6	12396.4	8675.62	16916.5	9968.62	80192.2
2255.99	11730.9	11606.1	17954.8	10803.6	12684.4	8490.62	18925.5	10753.6	82059.2
2260.62	6521.88	6003.12	9028.75	5536.62	5844.38	4704.62	10823.5	5446.62	36352.2
2265.24	3706.88	3006.12	4172.75	2635.62	2339.38	2791.62	5377.5	2369.62	12234.2
2269.85	3051.88	2263.12	2850.75	1694.62	1477.38	2363.62	3462.5	1487.62	6302.25
2274.47	2748.88	2059.12	2441.75	1301.62	1206.38	2217.62	2841.5	1241.62	4616.25
2279.08	2837.88	2068.12	2381.75	1107.62	1176.38	2157.62	2665.5	1156.62	4224.25
2283.68	2873.88	2101.12	2481.75	1232.62	1222.38	2247.62	2737.5	1247.62	4757.25
2288.29	3133.88	2397.12	2931.75	1402.62	1540.38	2469.62	3206.5	1475.62	6798.25
2292.89	3429.88	2687.12	3466.75	1772.62	1938.38	2599.62	3740.5	1805.62	9316.25
2297.48	3305.88	2561.12	3253.75	1689.62	1799.38	2496.62	3640.5	1666.62	8585.25
2302.08	2898.88	2137.12	2591.75	1281.62	1271.38	2209.62	2971.5	1298.62	5235.25
2306.67	2661.88	1865.12	2083.75	933.62	929.38	2006.62	2442.5	981.62	2922.25
2311.25	2552.88	1777.12	1936.75	830.62	787.38	1941.62	2204.5	903.62	1945.25
2315.84	2559.88	1717.12	1869.75	743.62	717.38	1939.62	2105.5	813.62	1498.25
2320.41	2494.88	1702.12	1794.75	701.62	716.38	1884.62	2077.5	780.62	1238.25
2324.99	2471.88	1677.12	1770.75	668.62	672.38	1908.62	2004.5	772.62	1108.25
2329.56	2424.88	1615.12	1703.75	688.62	634.38	1948.62	1935.5	754.62	993.25
2334.13	2398.88	1632.12	1737.75	671.62	648.38	1941.62	1971.5	763.62	931.25
2338.7	2509.88	1631.12	1718.75	644.62	647.38	1902.62	1981.5	716.62	917.25
2343.26	2479.88	1635.12	1725.75	686.62	652.38	1875.62	1928.5	748.62	883.25
2347.82	2478.88	1636.12	1729.75	642.62	599.38	1904.62	1967.5	732.62	788.25
2352.38	2496.88	1657.12	1714.75	654.62	608.38	1863.62	1981.5	719.62	692.25
2356.93	2418.88	1636.12	1676.75	650.62	615.38	1886.62	1928.5	750.62	690.25
2361.48	2447.88	1587.12	1686.75	611.62	639.38	1880.62	1933.5	705.62	620.25
2366.02	2454.88	1644.12	1658.75	617.62	600.38	1880.62	1863.5	707.62	633.25
2370.57	2476.88	1642.12	1702.75	644.62	587.38	1876.62	1970.5	711.62	610.25
2375.11	2465.88	1627.12	1679.75	632.62	612.38	1878.62	1939.5	728.62	543.25
2379.64	2429.88	1636.12	1667.75	608.62	620.38	1879.62	1896.5	715.62	590.25
2384.17	2445.88	1642.12	1675.75	612.62	617.38	1897.62	1916.5	718.62	588.25
2388.7	2464.88	1592.12	1667.75	637.62	591.38	1894.62	1959.5	724.62	625.25
2393.23	2446.88	1592.12	1642.75	609.62	588.38	1884.62	1890.5	729.62	616.25
2397.75	2451.88	1615.12	1684.75	612.62	617.38	1887.62	1906.5	708.62	661.25
2402.27	2442.88	1639.12	1675.75	647.62	599.38	1869.62	1887.5	737.62	681.25
2406.79	2397.88	1607.12	1696.75	642.62	582.38	1924.62	1885.5	738.62	713.25
2411.3	2442.88	1623.12	1658.75	627.62	575.38	1893.62	1897.5	710.62	716.25
2415.81	2457.88	1656.12	1727.75	646.62	566.38	1947.62	1870.5	694.62	727.25
2420.32	2474.88	1649.12	1719.75	662.62	565.38	1917.62	1863.5	727.62	717.25
2424.82	2505.88	1742.12	1754.75	679.62	515.38	1952.62	1833.5	740.62	648.25
2429.32	2485.88	1708.12	1794.75	700.62	501.38	1962.62	1775.5	745.62	678.25
2433.81	2512.88	1745.12	1766.75	681.62	490.38	1961.62	1759.5	756.62	686.25
2438.31	2520.88	1690.12	1718.75	688.62	496.38	1976.62	1857.5	746.62	644.25
2442.8	2486.88	1636.12	1699.75	646.62	548.38	1982.62	1832.5	713.62	595.25
2447.28	2506.88	1649.12	1717.75	654.62	572.38	1981.62	1890.5	710.62	600.25
2451.77	2478.88	1657.12	1719.75	613.62	592.38	1938.62	1877.5	713.62	590.25
2456.24	2489.88	1626.12	1683.75	621.62	573.38	1949.62	1871.5	689.62	577.25
2460.72	2452.88	1638.12	1684.75	616.62	546.38	1967.62	1908.5	730.62	586.25
2465.2	2471.88	1674.12	1694.75	637.62	542.38	1952.62	1899.5	725.62	571.25
2469.66	2500.88	1639.12	1703.75	595.62	580.38	1952.62	1880.5	707.62	568.25
2474.13	2496.88	1633.12	1665.75	599.62	624.38	1910.62	1925.5	711.62	546.25
2478.59	2495.88	1620.12	1709.75	625.62	606.38	1898.62	1888.5	709.62	566.25
2483.05	2464.88	1606.12	1676.75	598.62	619.38	1908.62	1922.5	720.62	545.25
2487.51	2509.88	1685.12	1711.75	634.62	593.38	1903.62	1921.5	757.62	557.25
2491.97	2466.88	1633.12	1711.75	591.62	559.38	1900.62	1965.5	706.62	587.25
2496.42	2498.88	1665.12	1682.75	609.62	576.38	1902.62	1948.5	712.62	501.25
2500.86	2480.88	1645.12	1697.75	608.62	611.38	1883.62	1905.5	704.62	507.25
2505.31	2510.88	1655.12	1685.75	609.62	601.38	1910.62	1920.5	701.62	454.25
2509.75	2510.88	1681.12	1694.75	629.62	597.38	1887.62	1941.5	695.62	496.25
2514.19	2519.88	1666.12	1720.75	617.62	584.38	1917.62	1938.5	738.62	479.25
2518.62	2529.88	1656.12	1706.75	605.62	597.38	1883.62	1930.5	706.62	467.25
2523.05	2538.88	1681.12	1710.75	619.62	582.38	1906.62	1906.5	713.62	460.25
2527.48	2507.88	1661.12	1698.75	611.62	562.38	1901.62	1887.5	692.62	403.25
2531.9	2516.88	1653.12	1686.75	591.62	557.38	1915.62	1901.5	702.62	410.25
2536.32	2507.88	1635.12	1723.75	605.62	563.38	1867.62	1937.5	733.62	387.25
2540.74	2476.88	1660.12	1679.75	601.62	568.38	1873.62	1929.5	717.62	420.25
2545.16	2465.88	1617.12	1689.75	603.62	565.38	1910.62	1916.5	693.62	407.25
2549.57	2509.88	1680.12	1689.75	659.62	566.38	1920.62	1934.5	722.62	370.25
2553.98	2516.88	1680.12	1718.75	609.62	598.38	1889.62	1956.5	709.62	430.25
2558.38	2518.88	1697.12	1724.75	599.62	592.38	1903.62	1925.5	707.62	375.25
2562.78	2518.88	1668.12	1734.75	594.62	584.38	1875.62	1909.5	721.62	386.25
2567.18	2529.88	1668.12	1698.75	609.62	575.38	1903.62	1933.5	722.62	376.25
2571.58	2525.88	1686.12	1751.75	625.62	580.38	1930.62	2006.5	743.62	359.25
2575.97	2511.88	1637.12	1685.75	617.62	618.38	1866.62	1955.5	745.62	391.25
2580.36	2495.88	1656.12	1721.75	606.62	609.38	1928.62	1974.5	728.62	353.25
2584.75	2531.88	1682.12	1723.75	622.62	573.38	1913.62	1965.5	724.62	385.25
2589.13	2510.88	1686.12	1776.75	611.62	574.38	1883.62	1954.5	715.62	356.25
2593.51	2561.88	1709.12	1792.75	615.62	596.38	1914.62	1986.5	724.62	365.25
2597.89	2532.88	1704.12	1746.75	622.62	583.38	1948.62	1995.5	737.62	367.25
2602.26	2532.88	1700.12	1786.75	621.62	609.38	1898.62	2034.5	749.62	337.25
2606.63	2526.88	1730.12	1761.75	629.62	576.38	1893.62	1952.5	754.62	369.25
2611	2510.88	1671.12	1780.75	596.62	602.38	1935.62	1993.5	757.62	351.25
2615.36	2507.88	1683.12	1760.75	630.62	585.38	1913.62	1970.5	731.62	401.25
2619.72	2539.88	1680.12	1733.75	596.62	584.38	1897.62	1998.5	759.62	391.25
2624.08	2534.88	1747.12	1768.75	604.62	602.38	1954.62	2037.5	722.62	394.25
2628.44	2553.88	1699.12	1801.75	625.62	595.38	1961.62	1989.5	760.62	390.25
2632.79	2570.88	1738.12	1778.75	621.62	609.38	1917.62	2004.5	732.62	403.25
2637.14	2540.88	1675.12	1758.75	635.62	631.38	1933.62	1970.5	744.62	376.25
2641.48	2558.88	1707.12	1779.75	606.62	555.38	1964.62	1963.5	735.62	376.25
2645.82	2572.88	1713.12	1803.75	594.62	607.38	1973.62	1985.5	725.62	403.25
2650.16	2595.88	1717.12	1768.75	619.62	594.38	1958.62	1988.5	729.62	372.25
2654.5	2610.88	1750.12	1798.75	659.62	620.38	2022.62	2042.5	782.62	352.25
2658.83	2552.88	1724.12	1840.75	645.62	552.38	2019.62	2026.5	757.62	362.25
2663.16	2581.88	1744.12	1754.75	634.62	578.38	2094.62	2020.5	747.62	355.25
2667.49	2591.88	1707.12	1808.75	622.62	639.38	2077.62	1945.5	780.62	345.25
2671.81	2574.88	1740.12	1822.75	623.62	589.38	2111.62	1996.5	753.62	319.25
2676.13	2577.88	1733.12	1820.75	622.62	575.38	2109.62	1951.5	794.62	347.25
2680.45	2537.88	1726.12	1784.75	635.62	589.38	2149.62	1963.5	754.62	366.25
2684.76	2545.88	1750.12	1817.75	601.62	548.38	2174.62	1945.5	782.62	369.25
2689.07	2568.88	1687.12	1782.75	617.62	569.38	2225.62	1947.5	760.62	412.25
2693.38	2564.88	1746.12	1775.75	629.62	601.38	2200.62	1951.5	742.62	407.25
2697.68	2586.88	1735.12	1741.75	627.62	597.38	2252.62	1973.5	800.62	455.25
2701.98	2603.88	1747.12	1790.75	661.62	598.38	2261.62	1919.5	790.62	489.25
2706.28	2675.88	1794.12	1922.75	649.62	622.38	2241.62	2052.5	819.62	527.25
2710.58	2704.88	1837.12	1954.75	703.62	649.38	2276.62	2068.5	886.62	603.25
2714.87	2716.88	1912.12	2030.75	731.62	643.38	2308.62	2131.5	919.62	735.25
2719.16	2856.88	1954.12	2179.75	815.62	703.38	2331.62	2207.5	949.62	1035.25
2723.44	2920.88	2072.12	2315.75	886.62	777.38	2382.62	2393.5	1085.62	1568.25
2727.73	3016.88	2195.12	2553.75	1108.62	909.38	2450.62	2610.5	1225.62	2498.25
2732.01	3155.88	2353.12	2800.75	1252.62	1152.38	2489.62	2834.5	1380.62	3761.25
2736.28	3224.88	2421.12	2873.75	1323.62	1190.38	2484.62	2931.5	1427.62	4517.25
2740.56	3124.88	2300.12	2715.75	1147.62	1111.38	2378.62	2852.5	1324.62	4003.25
2744.83	2953.88	2170.12	2481.75	972.62	949.38	2256.62	2589.5	1202.62	2921.25
2749.09	2810.88	2007.12	2242.75	875.62	858.38	2156.62	2414.5	1052.62	2088.25
2753.36	2736.88	1930.12	2153.75	805.62	795.38	2089.62	2286.5	996.62	1627.25
2757.62	2721.88	1882.12	2062.75	764.62	746.38	2051.62	2239.5	926.62	1321.25
2761.88	2669.88	1825.12	1992.75	749.62	694.38	2032.62	2201.5	894.62	1136.25
2766.14	2625.88	1816.12	1944.75	764.62	687.38	2027.62	2177.5	899.62	1022.25
2770.39	2653.88	1807.12	1974.75	769.62	675.38	1993.62	2182.5	853.62	952.25
2774.64	2613.88	1840.12	1979.75	735.62	655.38	2004.62	2157.5	892.62	889.25
2778.88	2627.88	1784.12	1929.75	748.62	669.38	1991.62	2201.5	861.62	922.25
2783.13	2591.88	1773.12	1944.75	747.62	641.38	1975.62	2204.5	857.62	910.25
2787.37	2667.88	1784.12	2004.75	740.62	611.38	1993.62	2218.5	885.62	917.25
2791.6	2616.88	1820.12	1992.75	715.62	640.38	1989.62	2269.5	917.62	933.25
2795.84	2616.88	1795.12	1990.75	754.62	653.38	2001.62	2281.5	907.62	915.25
2800.07	2658.88	1839.12	1992.75	722.62	663.38	2008.62	2371.5	899.62	930.25
2804.3	2672.88	1855.12	2045.75	727.62	693.38	2009.62	2431.5	930.62	975.25
2808.52	2697.88	1872.12	2109.75	754.62	681.38	2044.62	2511.5	990.62	1009.25
2812.74	2734.88	1921.12	2151.75	736.62	677.38	2117.62	2641.5	993.62	1076.25
2816.96	2762.88	1990.12	2206.75	749.62	733.38	2149.62	2938.5	991.62	1134.25
2821.18	2808.88	1989.12	2284.75	797.62	759.38	2190.62	3224.5	1047.62	1270.25
2825.39	2884.88	2062.12	2337.75	830.62	746.38	2283.62	3718.5	1069.62	1445.25
2829.6	3051.88	2253.12	2603.75	931.62	856.38	2406.62	4496.5	1217.62	1806.25
2833.81	3283.88	2537.12	2953.75	1039.62	941.38	2609.62	5280.5	1380.62	2342.25
2838.01	3783.88	2930.12	3574.75	1269.62	1112.38	2925.62	5927.5	1673.62	3076.25
2842.21	4217.88	3448.12	4244.75	1469.62	1290.38	3234.62	6114.5	1997.62	3828.25
2846.41	4422.88	3719.12	4985.75	1541.62	1313.38	3287.62	5735.5	2342.62	4236.25
2850.61	4464.88	4001.12	5786.75	1476.62	1232.38	3098.62	4994.5	2722.62	4219.25
2854.8	4625.88	4259.12	6561.75	1470.62	1246.38	2954.62	4382.5	3161.62	4082.25
2858.99	4895.88	4597.12	6980.75	1534.62	1225.38	2937.62	4194.5	3498.62	4123.25
2863.17	5334.88	4825.12	7088.75	1785.62	1312.38	3240.62	4286.5	3717.62	4345.25
2867.35	5709.88	5161.12	7293.75	2147.62	1479.38	3621.62	4705.5	3925.62	4867.25
2871.53	6187.88	5494.12	7440.75	2760.62	1604.38	4016.62	5099.5	4082.62	5505.25
2875.71	6414.88	5830.12	7767.75	3390.62	1696.38	4355.62	5386.5	4266.62	6197.25
2879.89	6859.88	6201.12	8161.75	3813.62	1814.38	4608.62	5755.5	4492.62	6826.25
2884.06	7220.88	6489.12	8500.75	3813.62	1978.38	4980.62	6157.5	4550.62	7151.25
2888.22	7223.88	6607.12	8739.75	3595.62	1982.38	5248.62	6345.5	4596.62	7229.25
2892.39	7172.88	6530.12	8538.75	3433.62	1888.38	5131.62	6307.5	4467.62	7154.25
2896.55	6991.88	6355.12	8338.75	3320.62	1833.38	4938.62	5976.5	4359.62	6944.25
2900.71	6934.88	6204.12	8095.75	3357.62	1798.38	4848.62	5868.5	4306.62	6884.25
2904.87	6862.88	6236.12	8153.75	3585.62	1804.38	4901.62	5909.5	4275.62	6953.25
2909.02	6868.88	6197.12	8045.75	3750.62	1915.38	5050.62	6026.5	4324.62	7165.25
2913.17	6827.88	6185.12	7901.75	3927.62	1921.38	5375.62	6090.5	4335.62	7680.25
2917.32	6820.88	6131.12	7705.75	4076.62	1983.38	6150.62	6233.5	4351.62	8492.25
2921.46	7188.88	6384.12	7984.75	4248.62	2205.38	7599.62	6646.5	4455.62	9913.25
2925.6	7592.88	6964.12	8403.75	4472.62	2566.38	8422.62	7339.5	4733.62	12417.2
2929.74	8254.88	7565.12	9558.75	4974.62	3296.38	8175.62	8613.5	5263.62	17250.2
2933.88	9207.88	8727.12	11987.8	6376.62	5008.38	8240.62	11191.5	6839.62	28573.2
2938.01	12495.9	12344.1	18475.8	10219.6	9653.38	11100.6	17778.5	10803.6	58997.2
2942.14	20109.9	20669.1	32506.8	18987.6	19956.4	16220.6	31932.5	19236.6	128074
2946.27	25208.9	25873.1	40639.8	25567.6	27665.4	16795.6	41858.5	24538.6	180253
2950.39	19450.9	19570.1	29690.8	19414.6	20641.4	11873.6	32315.5	17859.6	136901
2954.51	11824.9	11478.1	16225.8	10418.6	10412.4	7476.62	18437.5	9609.62	67009.2
2958.63	7956.88	7220.12	9804.75	6080.62	5260.38	5452.62	11359.5	5581.62	31133.2
2962.74	6452.88	5740.12	7243.75	4509.62	3388.38	4650.62	8336.5	4066.62	18101.2
2966.86	5811.88	5018.12	6256.75	3941.62	2639.38	4200.62	7074.5	3398.62	13142.2
2970.97	5315.88	4543.12	5583.75	3701.62	2346.38	3957.62	6296.5	3095.62	11030.2
2975.07	4887.88	4141.12	5069.75	3455.62	2161.38	3697.62	5709.5	2752.62	10178.2
2979.18	4574.88	3805.12	4661.75	3168.62	2161.38	3542.62	5516.5	2545.62	10158.2
2983.28	4364.88	3615.12	4535.75	2905.62	2163.38	3482.62	5373.5	2462.62	10678.2
2987.37	4291.88	3561.12	4570.75	2788.62	2315.38	3623.62	5446.5	2438.62	11593.2
2991.47	4337.88	3645.12	4753.75	2790.62	2470.38	3777.62	5593.5	2560.62	13102.2
2995.56	4522.88	3828.12	5008.75	2859.62	2724.38	4057.62	5925.5	2762.62	14982.2
2999.65	4663.88	3983.12	5332.75	3061.62	3030.38	4170.62	6231.5	2918.62	16895.2
3003.74	4827.88	4144.12	5531.75	3137.62	3229.38	4150.62	6342.5	3069.62	18189.2
3007.82	4747.88	4108.12	5503.75	3152.62	3264.38	4002.62	6270.5	3071.62	18557.2
3011.9	4632.88	3948.12	5189.75	2997.62	3126.38	3772.62	5918.5	2852.62	17624.2
3015.98	4378.88	3697.12	4785.75	2666.62	2810.38	3494.62	5489.5	2587.62	15846.2
3020.05	4082.88	3406.12	4424.75	2403.62	2572.38	3212.62	4970.5	2353.62	13769.2
3024.12	3855.88	3120.12	4009.75	2147.62	2296.38	2978.62	4601.5	2110.62	11787.2
3028.19	3688.88	2916.12	3745.75	1958.62	2108.38	2819.62	4249.5	1946.62	10303.2
3032.26	3545.88	2814.12	3488.75	1761.62	1914.38	2732.62	3987.5	1815.62	9010.25
3036.32	3408.88	2675.12	3289.75	1677.62	1789.38	2614.62	3785.5	1696.62	8014.25
3040.38	3284.88	2577.12	3174.75	1561.62	1653.38	2557.62	3582.5	1599.62	7413.25
3044.44	3226.88	2479.12	3053.75	1468.62	1629.38	2480.62	3507.5	1496.62	6846.25
3048.49	3188.88	2440.12	2972.75	1426.62	1551.38	2493.62	3412.5	1504.62	6379.25
3052.55	3162.88	2423.12	2875.75	1373.62	1512.38	2448.62	3274.5	1442.62	5971.25
3056.59	3101.88	2371.12	2824.75	1337.62	1539.38	2442.62	3216.5	1408.62	5657.25
3060.64	3116.88	2374.12	2791.75	1332.62	1575.38	2382.62	3195.5	1375.62	5349.25
3064.68	3049.88	2277.12	2713.75	1283.62	1532.38	2412.62	3098.5	1335.62	5173.25
3068.72	3010.88	2204.12	2657.75	1214.62	1488.38	2362.62	3050.5	1289.62	4999.25
3072.76	2983.88	2226.12	2609.75	1236.62	1418.38	2324.62	2961.5	1261.62	4837.25
3076.8	2928.88	2197.12	2531.75	1186.62	1332.38	2333.62	2902.5	1262.62	4660.25
3080.83	2918.88	2134.12	2502.75	1154.62	1280.38	2313.62	2851.5	1217.62	4500.25
3084.86	2836.88	2089.12	2413.75	1110.62	1242.38	2247.62	2813.5	1191.62	4348.25
3088.88	2772.88	2038.12	2408.75	1113.62	1215.38	2258.62	2678.5	1170.62	4258.25
3092.91	2795.88	2045.12	2374.75	1070.62	1203.38	2264.62	2718.5	1164.62	4076.25
3096.93	2772.88	2037.12	2318.75	1039.62	1130.38	2267.62	2690.5	1120.62	3899.25
3100.94	2756.88	1991.12	2265.75	997.62	1128.38	2261.62	2630.5	1082.62	3754.25
3104.96	2714.88	1976.12	2231.75	1007.62	1085.38	2223.62	2545.5	1074.62	3596.25
3108.97	2713.88	1927.12	2169.75	1005.62	1099.38	2269.62	2515.5	1056.62	3369.25
3112.98	2684.88	1922.12	2155.75	978.62	1087.38	2250.62	2516.5	1044.62	3315.25
3116.99	2606.88	1913.12	2101.75	935.62	1099.38	2261.62	2497.5	1024.62	3148.25
3120.99	2614.88	1825.12	2068.75	926.62	1052.38	2270.62	2404.5	1015.62	3001.25
3124.99	2567.88	1816.12	2044.75	912.62	1009.38	2251.62	2370.5	929.62	2805.25
3128.99	2544.88	1800.12	1975.75	913.62	1005.38	2249.62	2314.5	948.62	2683.25
3132.98	2543.88	1769.12	1970.75	891.62	1051.38	2262.62	2295.5	940.62	2528.25
3136.97	2523.88	1726.12	1928.75	869.62	969.38	2228.62	2255.5	905.62	2443.25
3140.96	2430.88	1715.12	1860.75	832.62	968.38	2249.62	2152.5	915.62	2361.25
3144.95	2455.88	1709.12	1846.75	791.62	905.38	2223.62	2161.5	858.62	2201.25
3148.93	2453.88	1695.12	1856.75	820.62	902.38	2212.62	2150.5	850.62	2108.25
3152.91	2453.88	1708.12	1812.75	790.62	862.38	2209.62	2174.5	846.62	2015.25
3156.89	2481.88	1661.12	1828.75	784.62	821.38	2170.62	2077.5	859.62	1915.25
3160.87	2424.88	1653.12	1766.75	794.62	816.38	2151.62	2086.5	811.62	1891.25
3164.84	2412.88	1641.12	1770.75	806.62	784.38	2182.62	2070.5	818.62	1951.25
3168.81	2412.88	1660.12	1812.75	778.62	824.38	2171.62	2111.5	798.62	1908.25
3172.78	2363.88	1626.12	1739.75	749.62	770.38	2092.62	2021.5	778.62	1805.25
3176.74	2412.88	1637.12	1734.75	756.62	702.38	2024.62	2029.5	813.62	1610.25
3180.7	2365.88	1587.12	1741.75	728.62	713.38	1987.62	2016.5	786.62	1478.25
3184.66	2317.88	1603.12	1694.75	710.62	704.38	1961.62	1961.5	750.62	1352.25
3188.62	2298.88	1562.12	1625.75	710.62	723.38	1923.62	1969.5	745.62	1292.25
3192.57	2331.88	1588.12	1672.75	714.62	686.38	1890.62	1987.5	747.62	1259.25
3196.52	2270.88	1537.12	1674.75	698.62	687.38	1886.62	1914.5	722.62	1221.25
3200.47	2310.88	1544.12	1681.75	709.62	673.38	1887.62	1938.5	738.62	1244.25
3204.42	2318.88	1593.12	1654.75	721.62	684.38	1867.62	1978.5	753.62	1256.25
3208.36	2315.88	1601.12	1671.75	721.62	676.38	1872.62	1961.5	754.62	1247.25
3212.3	2311.88	1590.12	1677.75	708.62	679.38	1838.62	1963.5	714.62	1156.25
3216.24	2262.88	1527.12	1639.75	686.62	642.38	1811.62	1898.5	726.62	1032.25
3220.17	2274.88	1505.12	1597.75	680.62	660.38	1813.62	1894.5	720.62	957.25
3224.1	2235.88	1501.12	1607.75	658.62	643.38	1781.62	1851.5	685.62	889.25
3228.03	2228.88	1523.12	1558.75	686.62	602.38	1764.62	1862.5	695.62	807.25
3231.95	2218.88	1481.12	1548.75	646.62	665.38	1771.62	1833.5	704.62	779.25
3235.88	2221.88	1477.12	1529.75	651.62	660.38	1760.62	1790.5	690.62	730.25
3239.8	2236.88	1487.12	1535.75	645.62	625.38	1773.62	1830.5	669.62	730.25
3243.72	2213.88	1487.12	1551.75	662.62	610.38	1731.62	1806.5	674.62	682.25
3247.63	2189.88	1460.12	1553.75	615.62	628.38	1770.62	1811.5	657.62	636.25
3251.54	2184.88	1471.12	1505.75	643.62	611.38	1738.62	1754.5	656.62	571.25
3255.45	2201.88	1444.12	1559.75	649.62	592.38	1737.62	1773.5	666.62	601.25
3259.36	2179.88	1436.12	1493.75	627.62	564.38	1745.62	1760.5	625.62	580.25
3263.26	2233.88	1430.12	1482.75	632.62	554.38	1743.62	1776.5	655.62	561.25
3267.16	2227.88	1417.12	1501.75	616.62	607.38	1727.62	1768.5	634.62	532.25
3271.06	2184.88	1457.12	1498.75	634.62	589.38	1765.62	1809.5	637.62	507.25
3274.96	2190.88	1488.12	1517.75	638.62	601.38	1710.62	1801.5	666.62	464.25
3278.85	2176.88	1474.12	1508.75	611.62	582.38	1700.62	1748.5	647.62	458.25
3282.74	2180.88	1440.12	1487.75	626.62	593.38	1698.62	1774.5	659.62	476.25
3286.63	2150.88	1429.12	1476.75	572.62	549.38	1715.62	1755.5	628.62	471.25
3290.52	2172.88	1444.12	1470.75	619.62	573.38	1732.62	1777.5	636.62	453.25
3294.4	2157.88	1471.12	1458.75	620.62	583.38	1740.62	1757.5	633.62	427.25
3298.28	2195.88	1452.12	1507.75	594.62	574.38	1729.62	1736.5	620.62	424.25
3302.16	2147.88	1434.12	1439.75	621.62	542.38	1722.62	1730.5	635.62	409.25
3306.03	2156.88	1437.12	1448.75	603.62	595.38	1665.62	1736.5	618.62	411.25
3309.9	2153.88	1416.12	1470.75	584.62	613.38	1702.62	1736.5	629.62	385.25
3313.77	2169.88	1393.12	1479.75	623.62	587.38	1685.62	1745.5	622.62	405.25
3317.64	2121.88	1378.12	1418.75	588.62	569.38	1727.62	1733.5	645.62	403.25
3321.5	2143.88	1415.12	1456.75	607.62	580.38	1696.62	1748.5	616.62	422.25
3325.36	2109.88	1373.12	1409.75	596.62	589.38	1707.62	1675.5	603.62	402.25
3329.22	2106.88	1401.12	1435.75	578.62	560.38	1712.62	1717.5	605.62	391.25
3333.07	2095.88	1390.12	1449.75	593.62	542.38	1723.62	1773.5	619.62	405.25
3336.93	2113.88	1372.12	1425.75	601.62	554.38	1737.62	1728.5	596.62	381.25
3340.78	2111.88	1413.12	1380.75	607.62	605.38	1724.62	1720.5	629.62	363.25
3344.63	2095.88	1390.12	1430.75	578.62	600.38	1734.62	1740.5	628.62	350.25
3348.47	2112.88	1352.12	1366.75	560.62	574.38	1747.62	1725.5	605.62	367.25
3352.31	2100.88	1397.12	1407.75	565.62	552.38	1752.62	1704.5	606.62	361.25
3356.15	2090.88	1357.12	1387.75	593.62	576.38	1762.62	1713.5	605.62	401.25
3359.99	2097.88	1352.12	1392.75	574.62	571.38	1830.62	1698.5	604.62	315.25
3363.82	2080.88	1359.12	1399.75	553.62	577.38	1851.62	1693.5	595.62	361.25
3367.66	2064.88	1352.12	1380.75	556.62	583.38	1891.62	1656.5	611.62	346.25
3371.48	2083.88	1333.12	1348.75	570.62	590.38	1884.62	1712.5	612.62	385.25
3375.31	2027.88	1335.12	1304.75	575.62	589.38	1991.62	1710.5	582.62	397.25
3379.14	2056.88	1322.12	1360.75	542.62	586.38	1968.62	1683.5	622.62	385.25
3382.96	2023.88	1282.12	1280.75	582.62	594.38	1979.62	1620.5	597.62	400.25
3386.77	2056.88	1366.12	1354.75	540.62	588.38	1969.62	1694.5	605.62	433.25
3390.59	2021.88	1326.12	1317.75	556.62	559.38	1972.62	1679.5	619.62	391.25
3394.4	1983.88	1297.12	1355.75	543.62	593.38	1945.62	1702.5	623.62	386.25
3398.21	2010.88	1293.12	1310.75	540.62	568.38	1913.62	1657.5	605.62	385.25
3402.02	2026.88	1288.12	1278.75	578.62	586.38	1946.62	1621.5	597.62	430.25
3405.83	1996.88	1342.12	1344.75	534.62	602.38	1851.62	1681.5	614.62	389.25
3409.63	2025.88	1332.12	1346.75	524.62	614.38	1769.62	1708.5	594.62	395.25
3413.43	1966.88	1292.12	1349.75	512.62	569.38	1728.62	1678.5	588.62	359.25
3417.23	2020.88	1279.12	1322.75	518.62	595.38	1729.62	1690.5	592.62	343.25
3421.02	1945.88	1291.12	1312.75	533.62	562.38	1693.62	1647.5	604.62	340.25
3424.81	1954.88	1309.12	1343.75	525.62	552.38	1672.62	1688.5	582.62	321.25
3428.6	1989.88	1282.12	1352.75	510.62	577.38	1668.62	1694.5	585.62	353.25
3432.39	2006.88	1286.12	1361.75	511.62	577.38	1644.62	1729.5	593.62	347.25
3436.18	1999.88	1296.12	1327.75	496.62	566.38	1698.62	1717.5	593.62	363.25
3439.96	1960.88	1290.12	1314.75	470.62	550.38	1706.62	1692.5	571.62	292.25
3443.74	1911.88	1258.12	1264.75	474.62	564.38	1742.62	1700.5	535.62	373.25
3447.51	1939.88	1238.12	1282.75	448.62	560.38	1787.62	1692.5	563.62	313.25
3451.29	1926.88	1198.12	1247.75	470.62	579.38	1830.62	1672.5	563.62	295.25
3455.06	1927.88	1232.12	1270.75	433.62	535.38	1860.62	1676.5	537.62	313.25
3458.83	1881.88	1156.12	1166.75	475.62	576.38	1926.62	1640.5	544.62	260.25
3462.59	1899.88	1128.12	1166.75	480.62	569.38	1924.62	1609.5	563.62	268.25
3466.36	1832.88	1174.12	1219.75	436.62	562.38	1921.62	1663.5	514.62	306.25
3470.12	1880.88	1157.12	1227.75	423.62	527.38	1907.62	1674.5	499.62	309.25
3473.88	1893.88	1189.12	1253.75	436.62	526.38	1841.62	1677.5	548.62	279.25
3477.63	1938.88	1184.12	1280.75	481.62	558.38	1756.62	1703.5	607.62	262.25
3481.39	1949.88	1253.12	1303.75	456.62	540.38	1718.62	1778.5	591.62	283.25
3485.14	1919.88	1241.12	1320.75	481.62	535.38	1682.62	1766.5	587.62	292.25
3488.88	1900.88	1226.12	1355.75	489.62	559.38	1656.62	1779.5	588.62	261.25
3492.63	1940.88	1208.12	1317.75	476.62	528.38	1678.62	1790.5	594.62	268.25
3496.37	1934.88	1214.12	1341.75	452.62	517.38	1636.62	1764.5	610.62	282.25
3500.11	1893.88	1229.12	1322.75	478.62	497.38	1609.62	1772.5	604.62	268.25
3503.85	1886.88	1257.12	1359.75	452.62	513.38	1619.62	1796.5	635.62	242.25
3507.59	1917.88	1263.12	1343.75	422.62	533.38	1632.62	1824.5	581.62	306.25
3511.32	1897.88	1234.12	1348.75	441.62	468.38	1626.62	1800.5	613.62	272.25
3515.05	1917.88	1251.12	1390.75	440.62	521.38	1650.62	1863.5	623.62	284.25
3518.78	1909.88	1270.12	1348.75	446.62	518.38	1609.62	1819.5	630.62	283.25
3522.5	1878.88	1209.12	1389.75	445.62	510.38	1653.62	1877.5	637.62	297.25
3526.22	1872.88	1203.12	1354.75	461.62	526.38	1676.62	1870.5	614.62	293.25
3529.94	1884.88	1206.12	1352.75	444.62	487.38	1685.62	1890.5	641.62	283.25
3533.66	1917.88	1222.12	1364.75	418.62	539.38	1671.62	1870.5	628.62	296.25
3537.38	1902.88	1193.12	1227.75	428.62	566.38	1713.62	1909.5	629.62	307.25
3541.09	1838.88	1156.12	1323.75	440.62	504.38	1743.62	1842.5	665.62	311.25
3544.8	1816.88	1215.12	1304.75	446.62	552.38	1743.62	1844.5	649.62	310.25
3548.51	1899.88	1209.12	1342.75	391.62	522.38	1831.62	1915.5	624.62	282.25
3552.21	1853.88	1186.12	1303.75	415.62	542.38	1901.62	1834.5	624.62	278.25
3555.91	1860.88	1196.12	1306.75	424.62	514.38	1907.62	1813.5	644.62	254.25
3559.61	1799.88	1154.12	1280.75	453.62	528.38	1947.62	1760.5	597.62	281.25
3563.31	1850.88	1148.12	1260.75	450.62	502.38	1969.62	1755.5	609.62	301.25
3567.01	1785.88	1112.12	1259.75	420.62	548.38	1882.62	1718.5	589.62	270.25
3570.7	1842.88	1164.12	1288.75	421.62	510.38	1915.62	1756.5	588.62	264.25
3574.39	1826.88	1119.12	1287.75	423.62	506.38	1879.62	1666.5	593.62	270.25
3578.07	1802.88	1152.12	1287.75	399.62	495.38	1878.62	1737.5	548.62	214.25
3581.76	1804.88	1139.12	1223.75	429.62	528.38	1818.62	1698.5	614.62	277.25
3585.44	1820.88	1159.12	1234.75	432.62	474.38	1827.62	1693.5	591.62	263.25
3589.12	1819.88	1193.12	1312.75	419.62	534.38	1777.62	1716.5	581.62	277.25
3592.8	1805.88	1152.12	1286.75	419.62	501.38	1709.62	1649.5	600.62	274.25
3596.47	1803.88	1185.12	1306.75	410.62	513.38	1699.62	1664.5	571.62	236.25
3600.14	1821.88	1197.12	1291.75	409.62	520.38	1689.62	1646.5	576.62	267.25
3603.81	1860.88	1171.12	1277.75	416.62	506.38	1692.62	1627.5	579.62	275.25
3607.48	1778.88	1186.12	1273.75	396.62	528.38	1646.62	1554.5	560.62	262.25
3611.14	1813.88	1152.12	1266.75	410.62	545.38	1601.62	1600.5	565.62	293.25
3614.81	1775.88	1157.12	1249.75	395.62	558.38	1617.62	1596.5	541.62	257.25
3618.47	1826.88	1169.12	1268.75	429.62	521.38	1631.62	1540.5	584.62	310.25
3622.12	1815.88	1164.12	1274.75	407.62	491.38	1548.62	1543.5	540.62	358.25
3625.78	1783.88	1169.12	1251.75	406.62	515.38	1539.62	1555.5	572.62	324.25
3629.43	1819.88	1165.12	1238.75	445.62	521.38	1529.62	1533.5	550.62	315.25
3633.08	1807.88	1143.12	1245.75	416.62	493.38	1569.62	1518.5	533.62	293.25
3636.73	1793.88	1203.12	1258.75	414.62	547.38	1512.62	1495.5	556.62	270.25
3640.37	1815.88	1195.12	1248.75	419.62	518.38	1521.62	1475.5	506.62	258.25
3644.01	1769.88	1159.12	1210.75	414.62	469.38	1542.62	1442.5	534.62	277.25
3647.65	1851.88	1183.12	1277.75	438.62	509.38	1523.62	1504.5	526.62	281.25
3651.29	1789.88	1157.12	1217.75	412.62	497.38	1499.62	1425.5	528.62	282.25
3654.93	1753.88	1133.12	1219.75	416.62	494.38	1487.62	1435.5	552.62	286.25
3658.56	1813.88	1196.12	1251.75	406.62	537.38	1494.62	1426.5	504.62	274.25
3662.19	1749.88	1190.12	1218.75	420.62	525.38	1485.62	1438.5	520.62	305.25
3665.82	1806.88	1160.12	1242.75	415.62	529.38	1504.62	1425.5	491.62	310.25
3669.44	1793.88	1149.12	1222.75	408.62	504.38	1500.62	1422.5	523.62	258.25
3673.06	1768.88	1150.12	1182.75	398.62	486.38	1506.62	1424.5	498.62	269.25
3676.68	1801.88	1177.12	1224.75	394.62	503.38	1490.62	1395.5	525.62	266.25
3680.3	1789.88	1166.12	1244.75	393.62	518.38	1478.62	1427.5	492.62	246.25
3683.91	1792.88	1174.12	1200.75	422.62	509.38	1457.62	1375.5	501.62	241.25
3687.53	1739.88	1177.12	1211.75	402.62	520.38	1494.62	1356.5	531.62	252.25
3691.14	1745.88	1167.12	1189.75	392.62	479.38	1479.62	1391.5	513.62	264.25
3694.75	1763.88	1139.12	1188.75	408.62	537.38	1471.62	1389.5	495.62	209.25
3698.35	1746.88	1138.12	1173.75	395.62	517.38	1440.62	1366.5	501.62	249.25
3701.95	1780.88	1178.12	1180.75	400.62	494.38	1466.62	1372.5	496.62	241.25
3705.55	1761.88	1155.12	1219.75	388.62	491.38	1462.62	1354.5	509.62	231.25
3709.15	1739.88	1125.12	1194.75	356.62	481.38	1487.62	1345.5	454.62	225.25
3712.75	1744.88	1147.12	1192.75	395.62	494.38	1436.62	1344.5	487.62	240.25
3716.34	1701.88	1126.12	1161.75	385.62	526.38	1453.62	1344.5	500.62	218.25
3719.93	1711.88	1118.12	1177.75	385.62	494.38	1431.62	1344.5	493.62	202.25
3723.52	1731.88	1138.12	1153.75	391.62	529.38	1439.62	1349.5	489.62	230.25
3727.11	1724.88	1142.12	1210.75	392.62	500.38	1444.62	1329.5	480.62	222.25
3730.69	1729.88	1134.12	1190.75	408.62	501.38	1452.62	1342.5	496.62	215.25
3734.27	1706.88	1098.12	1177.75	371.62	499.38	1454.62	1349.5	475.62	215.25
3737.85	1661.88	1098.12	1173.75	401.62	513.38	1463.62	1322.5	494.62	221.25
3741.43	1693.88	1138.12	1167.75	397.62	499.38	1438.62	1373.5	471.62	225.25
3745	1715.88	1086.12	1156.75	353.62	523.38	1420.62	1344.5	486.62	226.25
3748.57	1721.88	1132.12	1156.75	364.62	488.38	1438.62	1338.5	449.62	225.25
3752.14	1705.88	1146.12	1225.75	388.62	497.38	1425.62	1353.5	472.62	228.25
3755.71	1741.88	1116.12	1197.75	401.62	530.38	1472.62	1308.5	476.62	229.25
3759.27	1679.88	1150.12	1197.75	398.62	504.38	1459.62	1336.5	484.62	187.25
3762.83	1726.88	1087.12	1179.75	395.62	469.38	1415.62	1294.5	483.62	212.25
3766.39	1699.88	1101.12	1166.75	411.62	488.38	1458.62	1334.5	504.62	225.25
3769.95	1688.88	1107.12	1170.75	391.62	496.38	1444.62	1336.5	477.62	232.25
3773.5	1682.88	1099.12	1205.75	391.62	491.38	1445.62	1309.5	470.62	203.25
3777.05	1665.88	1089.12	1186.75	392.62	493.38	1420.62	1349.5	485.62	243.25
3780.61	1674.88	1090.12	1129.75	382.62	463.38	1435.62	1319.5	472.62	230.25
3784.15	1667.88	1080.12	1168.75	413.62	491.38	1470.62	1287.5	495.62	181.25
3787.7	1639.88	1053.12	1102.75	379.62	505.38	1464.62	1285.5	472.62	211.25
3791.24	1690.88	1094.12	1170.75	398.62	449.38	1467.62	1306.5	486.62	226.25
3794.78	1672.88	1060.12	1157.75	376.62	491.38	1502.62	1270.5	497.62	217.25
3798.32	1632.88	1076.12	1109.75	361.62	496.38	1532.62	1251.5	464.62	233.25
3801.85	1643.88	1030.12	1044.75	388.62	539.38	1538.62	1249.5	455.62	199.25
3805.39	1655.88	1053.12	1057.75	359.62	481.38	1622.62	1230.5	459.62	231.25
3808.92	1652.88	1032.12	1094.75	378.62	481.38	1654.62	1231.5	451.62	213.25
3812.45	1654.88	1061.12	1062.75	382.62	454.38	1728.62	1265.5	457.62	201.25
3815.97	1640.88	1009.12	1000.75	379.62	514.38	1771.62	1173.5	400.62	202.25
3819.49	1605.88	996.12	1049.75	347.62	501.38	1782.62	1199.5	435.62	222.25
3823.02	1595.88	988.12	1000.75	366.62	492.38	1794.62	1181.5	437.62	209.25
3826.53	1659.88	1005.12	999.75	372.62	460.38	1765.62	1208.5	439.62	234.25
3830.05	1610.88	1026.12	1056.75	381.62	461.38	1710.62	1198.5	411.62	188.25
3833.57	1639.88	1039.12	1061.75	367.62	484.38	1699.62	1219.5	442.62	198.25
3837.08	1630.88	1019.12	1072.75	378.62	494.38	1709.62	1253.5	458.62	207.25
3840.59	1654.88	1060.12	1102.75	372.62	527.38	1623.62	1236.5	452.62	185.25
3844.09	1639.88	1022.12	1089.75	375.62	473.38	1612.62	1242.5	428.62	216.25
3847.6	1668.88	1058.12	1089.75	372.62	501.38	1595.62	1270.5	444.62	195.25
3851.1	1648.88	1043.12	1101.75	365.62	457.38	1587.62	1276.5	469.62	241.25
3854.6	1676.88	1029.12	1085.75	375.62	519.38	1621.62	1252.5	473.62	206.25
3858.1	1674.88	1049.12	1107.75	382.62	491.38	1636.62	1246.5	441.62	211.25
3861.59	1658.88	1042.12	1107.75	384.62	440.38	1652.62	1260.5	460.62	178.25
3865.09	1604.88	1031.12	1073.75	374.62	484.38	1675.62	1219.5	446.62	235.25
3868.58	1634.88	1069.12	1086.75	371.62	492.38	1659.62	1268.5	457.62	223.25
3872.07	1623.88	1042.12	1067.75	388.62	496.38	1637.62	1255.5	453.62	251.25
3875.55	1655.88	1045.12	1103.75	389.62	478.38	1617.62	1229.5	429.62	242.25
3879.03	1612.88	1023.12	1096.75	383.62	459.38	1605.62	1214.5	443.62	206.25
3882.52	1616.88	994.12	1069.75	384.62	477.38	1580.62	1207.5	464.62	199.25
3886	1626.88	1015.12	1082.75	360.62	469.38	1603.62	1247.5	441.62	228.25
3889.47	1617.88	1018.12	1060.75	367.62	524.38	1580.62	1241.5	447.62	217.25
3892.95	1616.88	1017.12	1078.75	376.62	500.38	1545.62	1218.5	448.62	196.25
3896.42	1621.88	1033.12	1055.75	403.62	501.38	1553.62	1220.5	482.62	205.25
3899.89	1618.88	1037.12	1077.75	391.62	458.38	1553.62	1241.5	465.62	227.25
3903.36	1561.88	1008.12	1079.75	389.62	490.38	1500.62	1210.5	472.62	228.25
3906.82	1578.88	1037.12	1077.75	381.62	463.38	1484.62	1217.5	433.62	217.25
3910.28	1581.88	987.12	1061.75	407.62	549.38	1486.62	1188.5	452.62	210.25
3913.74	1583.88	1063.12	1127.75	379.62	512.38	1462.62	1224.5	466.62	226.25
3917.2	1642.88	1042.12	1122.75	364.62	519.38	1447.62	1227.5	431.62	236.25
3920.66	1601.88	1037.12	1122.75	375.62	503.38	1476.62	1246.5	458.62	246.25
3924.11	1603.88	1050.12	1100.75	375.62	490.38	1462.62	1259.5	450.62	237.25
3927.56	1594.88	1009.12	1087.75	361.62	531.38	1454.62	1248.5	421.62	225.25
3931.01	1557.88	1006.12	1069.75	374.62	476.38	1486.62	1228.5	424.62	228.25
3934.46	1558.88	994.12	1066.75	381.62	527.38	1459.62	1255.5	439.62	254.25
3937.9	1560.88	1027.12	1042.75	378.62	477.38	1489.62	1201.5	474.62	220.25
3941.34	1564.88	974.12	1045.75	364.62	494.38	1509.62	1212.5	412.62	213.25
3944.78	1595.88	1035.12	1096.75	363.62	455.38	1534.62	1207.5	439.62	218.25
3948.22	1528.88	952.12	1036.75	361.62	469.38	1545.62	1187.5	442.62	241.25
3951.66	1566.88	1008.12	1051.75	339.62	465.38	1563.62	1181.5	418.62	218.25
3955.09	1519.88	986.12	1016.75	360.62	510.38	1548.62	1161.5	436.62	200.25
3958.52	1520.88	977.12	1047.75	359.62	497.38	1568.62	1160.5	400.62	196.25
3961.95	1533.88	953.12	1044.75	380.62	512.38	1551.62	1125.5	448.62	199.25
3965.37	1539.88	995.12	985.75	362.62	466.38	1579.62	1151.5	432.62	236.25
3968.8	1519.88	943.12	1004.75	349.62	517.38	1541.62	1191.5	409.62	241.25
3972.22	1540.88	986.12	1000.75	352.62	487.38	1510.62	1159.5	438.62	252.25
3975.64	1551.88	965.12	1035.75	351.62	507.38	1507.62	1186.5	412.62	225.25
3979.05	1481.88	970.12	1031.75	347.62	467.38	1476.62	1170.5	409.62	248.25
3982.47	1507.88	975.12	1016.75	345.62	499.38	1450.62	1163.5	415.62	238.25
3985.88	1526.88	993.12	1046.75	363.62	441.38	1448.62	1202.5	425.62	256.25
3989.29	1536.88	985.12	1053.75	355.62	509.38	1417.62	1188.5	428.62	277.25
3992.7	1552.88	990.12	1076.75	359.62	468.38	1412.62	1189.5	427.62	267.25
3996.1	1551.88	1002.12	1064.75	349.62	480.38	1393.62	1184.5	417.62	262.25
3999.51	1527.88	980.12	1026.75	369.62	497.38	1371.62	1176.5	429.62	244.25
4002.91	1486.88	975.12	1032.75	351.62	477.38	1365.62	1184.5	409.62	285.25
4006.31	1463.88	949.12	1060.75	387.62	514.38	1336.62	1142.5	411.62	261.25
4009.7	1541.88	1012.12	1103.75	342.62	498.38	1356.62	1239.5	414.62	268.25
4013.1	1529.88	1028.12	1091.75	371.62	484.38	1350.62	1211.5	439.62	298.25
4016.49	1537.88	1006.12	1083.75	361.62	478.38	1355.62	1197.5	444.62	293.25
4019.88	1529.88	1010.12	1120.75	369.62	472.38	1339.62	1234.5	438.62	295.25
4023.27	1505.88	1011.12	1091.75	372.62	483.38	1309.62	1205.5	436.62	336.25
4026.65	1505.88	983.12	1030.75	357.62	490.38	1330.62	1148.5	428.62	371.25
4030.03	1519.88	959.12	1062.75	387.62	481.38	1372.62	1205.5	452.62	343.25
4033.42	1471.88	994.12	1067.75	401.62	489.38	1347.62	1218.5	440.62	380.25
4036.79	1475.88	979.12	1058.75	403.62	486.38	1356.62	1182.5	448.62	416.25
4040.17	1549.88	1021.12	1112.75	385.62	497.38	1353.62	1218.5	444.62	382.25
4043.54	1507.88	980.12	1047.75	382.62	517.38	1314.62	1213.5	433.62	390.25
4046.92	1536.88	1015.12	1118.75	360.62	509.38	1382.62	1247.5	427.62	379.25
4050.29	1505.88	974.12	1066.75	370.62	492.38	1335.62	1189.5	450.62	349.25
4053.65	1494.88	978.12	1036.75	388.62	521.38	1354.62	1154.5	425.62	339.25
4057.02	1442.88	937.12	1051.75	341.62	494.38	1351.62	1138.5	406.62	322.25
4060.38	1484.88	946.12	1043.75	334.62	500.38	1338.62	1162.5	421.62	288.25
4063.74	1484.88	959.12	1033.75	344.62	486.38	1312.62	1171.5	392.62	296.25
4067.1	1466.88	936.12	1041.75	342.62	485.38	1365.62	1164.5	413.62	284.25
4070.46	1451.88	953.12	1010.75	354.62	489.38	1381.62	1177.5	426.62	304.25
4073.81	1512.88	1013.12	1038.75	349.62	458.38	1360.62	1187.5	406.62	311.25
4077.16	1458.88	993.12	1029.75	349.62	484.38	1356.62	1137.5	374.62	304.25
4080.51	1470.88	947.12	1022.75	387.62	471.38	1348.62	1157.5	429.62	243.25
4083.86	1467.88	966.12	1027.75	375.62	482.38	1370.62	1149.5	401.62	265.25
4087.2	1480.88	942.12	1005.75	364.62	504.38	1378.62	1172.5	406.62	249.25
4090.55	1473.88	922.12	1007.75	336.62	512.38	1356.62	1155.5	413.62	219.25
4093.89	1447.88	963.12	1023.75	364.62	483.38	1383.62	1117.5	391.62	270.25
4097.23	1487.88	933.12	1022.75	342.62	468.38	1358.62	1144.5	381.62	254.25
4100.56	1426.88	954.12	1013.75	350.62	491.38	1361.62	1132.5	393.62	249.25
4103.9	1425.88	899.12	957.75	367.62	443.38	1340.62	1087.5	398.62	227.25
4107.23	1413.88	932.12	1032.75	340.62	479.38	1351.62	1114.5	399.62	224.25
4110.56	1394.88	933.12	983.75	344.62	443.38	1364.62	1112.5	382.62	227.25
4113.88	1437.88	930.12	963.75	311.62	468.38	1369.62	1096.5	384.62	258.25
4117.21	1400.88	903.12	963.75	321.62	479.38	1357.62	1101.5	377.62	233.25
4120.53	1436.88	900.12	977.75	327.62	447.38	1360.62	1105.5	399.62	233.25
4123.85	1434.88	940.12	967.75	348.62	495.38	1388.62	1121.5	423.62	205.25
4127.17	1446.88	912.12	969.75	337.62	485.38	1368.62	1099.5	413.62	225.25
4130.49	1445.88	892.12	1008.75	334.62	457.38	1353.62	1125.5	369.62	208.25
4133.8	1415.88	918.12	948.75	347.62	495.38	1335.62	1090.5	362.62	213.25
4137.11	1407.88	915.12	964.75	331.62	455.38	1341.62	1109.5	387.62	201.25
4140.43	1384.88	871.12	955.75	357.62	471.38	1305.62	1068.5	394.62	211.25
4143.73	1382.88	899.12	939.75	309.62	465.38	1294.62	1082.5	384.62	189.25
4147.04	1347.88	943.12	956.75	318.62	460.38	1292.62	1076.5	369.62	212.25
4150.34	1363.88	900.12	985.75	329.62	455.38	1261.62	1086.5	362.62	206.25
4153.64	1321.88	855.12	918.75	311.62	451.38	1243.62	1045.5	354.62	186.25
4156.94	1384.88	908.12	972.75	325.62	489.38	1252.62	1087.5	369.62	230.25
4160.24	1375.88	903.12	963.75	308.62	462.38	1215.62	1065.5	353.62	237.25
4163.53	1326.88	839.12	913.75	335.62	456.38	1246.62	1070.5	411.62	240.25
4166.83	1334.88	855.12	957.75	326.62	454.38	1213.62	1047.5	390.62	198.25
4170.12	1329.88	878.12	960.75	319.62	426.38	1250.62	1059.5	364.62	216.25
4173.4	1304.88	866.12	938.75	342.62	436.38	1207.62	1053.5	381.62	185.25
4176.69	1311.88	855.12	943.75	315.62	444.38	1253.62	1064.5	400.62	180.25
4179.97	1293.88	900.12	964.75	311.62	455.38	1227.62	1087.5	396.62	210.25
4183.26	1332.88	879.12	938.75	311.62	451.38	1223.62	1078.5	370.62	207.25
4186.54	1312.88	846.12	910.75	327.62	464.38	1190.62	1035.5	357.62	189.25
4189.81	1289.88	845.12	931.75	302.62	436.38	1116.62	1062.5	353.62	217.25
4193.09	1338.88	842.12	911.75	298.62	431.38	1187.62	1046.5	357.62	195.25
4196.36	1314.88	842.12	933.75	306.62	458.38	1159.62	1009.5	332.62	192.25
4199.63	1291.88	847.12	899.75	331.62	432.38	1162.62	1021.5	367.62	180.25
4202.9	1293.88	857.12	951.75	326.62	433.38	1142.62	1004.5	369.62	203.25
4206.17	1292.88	843.12	922.75	310.62	445.38	1184.62	985.5	359.62	197.25
4209.43	1317.88	883.12	950.75	314.62	461.38	1152.62	1030.5	369.62	206.25
4212.69	1303.88	838.12	954.75	313.62	436.38	1173.62	1015.5	348.62	160.25
4215.95	1268.88	862.12	877.75	279.62	423.38	1169.62	974.5	349.62	206.25
4219.21	1279.88	873.12	927.75	304.62	442.38	1165.62	1026.5	337.62	216.25
4222.47	1304.88	855.12	952.75	308.62	428.38	1167.62	1031.5	367.62	228.25
4225.72	1279.88	862.12	890.75	323.62	472.38	1204.62	1020.5	338.62	229.25
4228.97	1273.88	843.12	908.75	310.62	447.38	1157.62	1029.5	349.62	213.25
4232.22	1280.88	812.12	922.75	298.62	438.38	1178.62	1002.5	318.62	200.25
4235.47	1291.88	819.12	921.75	302.62	420.38	1157.62	992.5	337.62	195.25
4238.72	1260.88	824.12	907.75	298.62	413.38	1176.62	989.5	341.62	164.25
4241.96	1310.88	861.12	917.75	294.62	394.38	1193.62	972.5	335.62	177.25
4245.2	1228.88	803.12	856.75	292.62	451.38	1205.62	972.5	319.62	218.25
4248.44	1248.88	780.12	890.75	295.62	416.38	1195.62	956.5	345.62	200.25
4251.68	1285.88	803.12	881.75	287.62	374.38	1225.62	968.5	340.62	203.25
4254.91	1223.88	802.12	888.75	310.62	451.38	1267.62	975.5	339.62	173.25
4258.14	1244.88	751.12	833.75	291.62	413.38	1256.62	910.5	311.62	218.25
4261.37	1223.88	775.12	868.75	285.62	441.38	1287.62	937.5	321.62	187.25
4264.6	1243.88	785.12	863.75	282.62	460.38	1244.62	966.5	316.62	188.25
4267.83	1196.88	764.12	847.75	303.62	411.38	1243.62	926.5	335.62	214.25
4271.05	1214.88	779.12	866.75	295.62	426.38	1245.62	935.5	325.62	192.25
4274.27	1221.88	760.12	823.75	301.62	420.38	1242.62	949.5	325.62	190.25
4277.49	1218.88	785.12	879.75	299.62	401.38	1243.62	935.5	334.62	191.25
4280.71	1191.88	788.12	832.75	283.62	425.38	1195.62	942.5	327.62	210.25
4283.93	1234.88	766.12	884.75	248.62	444.38	1198.62	951.5	276.62	186.25
4287.14	1198.88	787.12	842.75	291.62	447.38	1189.62	910.5	305.62	213.25
4290.35	1203.88	776.12	838.75	281.62	462.38	1155.62	935.5	325.62	206.25
4293.56	1172.88	747.12	785.75	307.62	405.38	1139.62	885.5	320.62	201.25
4296.77	1236.88	779.12	859.75	264.62	400.38	1136.62	970.5	305.62	210.25
4299.98	1198.88	774.12	865.75	310.62	425.38	1106.62	943.5	351.62	183.25
4303.18	1222.88	757.12	872.75	250.62	391.38	1123.62	954.5	304.62	225.25
4306.38	1198.88	804.12	856.75	314.62	395.38	1127.62	953.5	330.62	216.25
4309.58	1183.88	768.12	873.75	293.62	428.38	1120.62	978.5	305.62	240.25
4312.78	1154.88	759.12	816.75	324.62	407.38	1111.62	937.5	322.62	251.25
4315.97	1151.88	756.12	855.75	304.62	384.38	1119.62	919.5	329.62	283.25
4319.16	1140.88	766.12	848.75	282.62	459.38	1155.62	932.5	323.62	313.25
4322.35	1183.88	771.12	853.75	303.62	446.38	1115.62	938.5	345.62	322.25
4325.54	1137.88	759.12	839.75	321.62	433.38	1112.62	935.5	344.62	363.25
4328.73	1186.88	751.12	833.75	296.62	424.38	1124.62	937.5	357.62	358.25
4331.91	1179.88	808.12	861.75	322.62	432.38	1137.62	965.5	338.62	340.25
4335.1	1136.88	732.12	830.75	281.62	459.38	1150.62	903.5	325.62	314.25
4338.28	1161.88	766.12	854.75	306.62	407.38	1180.62	940.5	317.62	292.25
4341.45	1124.88	727.12	805.75	302.62	405.38	1185.62	903.5	300.62	277.25
4344.63	1116.88	730.12	769.75	298.62	387.38	1193.62	855.5	315.62	304.25
4347.81	1110.88	704.12	781.75	294.62	438.38	1273.62	911.5	314.62	263.25
4350.98	1110.88	663.12	797.75	259.62	402.38	1414.62	823.5	259.62	237.25
4354.15	1085.88	667.12	703.75	278.62	345.38	1594.62	825.5	290.62	244.25
4357.31	1016.88	562.12	529.75	226.62	339.38	2011.62	699.5	197.62	281.25
4360.48	943.88	569.12	461.75	225.62	322.38	2459.62	705.5	181.62	239.25
4363.64	1013.88	655.12	583.75	234.62	465.38	2536.62	753.5	207.62	297.25
4366.81	1076.88	668.12	662.75	245.62	466.38	2315.62	887.5	232.62	276.25
4369.97	1111.88	721.12	717.75	294.62	406.38	1999.62	846.5	237.62	299.25
4373.12	1056.88	692.12	694.75	279.62	406.38	1828.62	813.5	260.62	239.25
4376.28	1059.88	683.12	674.75	303.62	348.38	1711.62	821.5	269.62	261.25
4379.43	1105.88	661.12	697.75	257.62	346.38	1808.62	797.5	249.62	268.25
4382.58	958.88	595.12	576.75	266.62	297.38	2039.62	724.5	217.62	215.25
4385.73	934.88	473.12	447.75	202.62	227.38	2555.62	562.5	156.62	254.25
4388.88	886.88	399.12	206.75	148.62	240.38	3231.62	441.5	100.62	221.25
4392.02	978.88	532.12	325.75	193.62	317.38	3581.62	616.5	70.62	316.25
4395.17	1025.88	630.12	498.75	206.62	310.38	3437.62	694.5	141.62	319.25
4398.31	1086.88	723.12	752.75	262.62	422.38	2885.62	833.5	210.62	271.25
4401.45	1028.88	651.12	1235.75	282.62	512.38	2366.62	822.5	276.62	241.25
4404.59	1076.88	719.12	1226.75	258.62	440.38	1971.62	881.5	282.62	286.25
4407.72	1076.88	718.12	758.75	276.62	463.38	1655.62	861.5	257.62	301.25
4410.85	1073.88	670.12	721.75	275.62	387.38	1426.62	813.5	310.62	219.25
4413.99	1061.88	724.12	754.75	258.62	386.38	1320.62	810.5	282.62	205.25
4417.11	1069.88	704.12	789.75	264.62	383.38	1288.62	860.5	285.62	187.25
4420.24	1065.88	699.12	735.75	272.62	387.38	1195.62	854.5	290.62	222.25
4423.37	1038.88	708.12	775.75	257.62	390.38	1181.62	863.5	272.62	174.25
4426.49	1009.88	673.12	752.75	245.62	410.38	1168.62	815.5	286.62	227.25
4429.61	1059.88	711.12	752.75	254.62	424.38	1128.62	844.5	297.62	210.25
4432.73	1039.88	683.12	769.75	290.62	431.38	1083.62	840.5	293.62	188.25
4435.85	1055.88	709.12	765.75	278.62	384.38	1079.62	828.5	292.62	225.25
4438.96	1037.88	665.12	749.75	251.62	397.38	1051.62	831.5	288.62	186.25
4442.07	1046.88	713.12	779.75	247.62	422.38	1036.62	814.5	248.62	196.25
4445.19	1043.88	672.12	730.75	259.62	378.38	1044.62	851.5	244.62	236.25
4448.29	1043.88	668.12	733.75	256.62	414.38	1056.62	819.5	302.62	207.25
4451.4	1066.88	695.12	764.75	266.62	383.38	1007.62	846.5	296.62	203.25
4454.51	1008.88	669.12	771.75	237.62	409.38	1026.62	815.5	278.62	241.25
4457.61	1031.88	696.12	768.75	256.62	381.38	1034.62	803.5	255.62	233.25
4460.71	1036.88	677.12	752.75	227.62	390.38	1068.62	811.5	267.62	231.25
4463.81	1003.88	665.12	707.75	247.62	380.38	1006.62	800.5	259.62	221.25
4466.9	1003.88	628.12	743.75	251.62	387.38	1031.62	785.5	273.62	183.25
4470	1016.88	656.12	731.75	266.62	377.38	1022.62	805.5	255.62	212.25
4473.09	997.88	637.12	689.75	243.62	347.38	1041.62	777.5	254.62	180.25
4476.18	984.88	656.12	730.75	223.62	355.38	987.62	789.5	248.62	207.25
4479.27	949.88	622.12	695.75	222.62	373.38	1001.62	731.5	242.62	195.25
4482.36	949.88	586.12	662.75	220.62	376.38	989.62	710.5	239.62	163.25
4485.44	968.88	609.12	698.75	223.62	367.38	1004.62	753.5	232.62	176.25
4488.53	967.88	590.12	686.75	245.62	364.38	983.62	748.5	238.62	155.25
4491.61	912.88	594.12	658.75	214.62	377.38	970.62	724.5	243.62	145.25
4494.69	921.88	600.12	680.75	230.62	318.38	979.62	711.5	224.62	149.25
4497.76	920.88	552.12	631.75	212.62	371.38	952.62	701.5	231.62	136.25
4500.84	903.88	588.12	665.75	247.62	359.38	925.62	696.5	260.62	124.25
4503.91	891.88	551.12	653.75	220.62	356.38	897.62	694.5	233.62	127.25
4506.98	884.88	560.12	632.75	215.62	311.38	884.62	677.5	229.62	152.25
4510.05	901.88	589.12	694.75	221.62	331.38	892.62	744.5	227.62	142.25
4513.12	894.88	574.12	664.75	231.62	350.38	881.62	729.5	236.62	138.25
4516.18	853.88	577.12	643.75	224.62	309.38	859.62	694.5	214.62	180.25
4519.25	824.88	561.12	609.75	207.62	352.38	816.62	667.5	218.62	140.25
4522.31	842.88	551.12	610.75	217.62	348.38	824.62	674.5	208.62	149.25
4525.37	805.88	533.12	589.75	192.62	320.38	804.62	667.5	208.62	151.25
4528.42	833.88	543.12	605.75	203.62	326.38	811.62	634.5	218.62	134.25
4531.48	804.88	517.12	581.75	186.62	324.38	774.62	645.5	212.62	139.25
4534.53	781.88	524.12	580.75	196.62	358.38	795.62	621.5	188.62	112.25
4537.58	779.88	509.12	571.75	171.62	295.38	762.62	625.5	194.62	110.25
4540.63	745.88	487.12	580.75	189.62	324.38	775.62	613.5	203.62	128.25
4543.68	780.88	502.12	570.75	182.62	312.38	738.62	629.5	192.62	137.25
4546.72	739.88	446.12	542.75	168.62	316.38	729.62	590.5	183.62	95.25
4549.77	722.88	485.12	539.75	164.62	273.38	718.62	573.5	207.62	151.25
4552.81	711.88	466.12	523.75	176.62	313.38	728.62	578.5	196.62	127.25
4555.85	701.88	433.12	520.75	169.62	302.38	694.62	572.5	178.62	117.25
4558.89	685.88	440.12	525.75	181.62	298.38	671.62	567.5	179.62	117.25
4561.92	705.88	446.12	511.75	161.62	284.38	667.62	542.5	177.62	118.25
4564.95	0.88	2.12	1.75	2.62	-0.62	0.62	0.5	-2.38	0.25
4567.99	0.88	3.12	-0.25	4.62	1.38	-4.38	-3.5	4.62	-0.75
4571.02	0.88	2.12	-1.25	-1.38	-3.62	-2.38	-0.5	-5.38	-1.75
4574.05	-1.12	-5.88	-2.25	0.62	-0.62	3.62	-0.5	-2.38	-0.75

## Sheet: Processed data
Wavenumber	Sample 1	Sample 2	Sample 3	Sample 4	Sample 5	Sample 6	Sample 7	Sample 8	ACN
2602.26	0.18099	0.18164	0.21309	0.18625	0.02147	0.09218	0.27139	0.17711	0.11747
2606.63	0.18099	0.18495	0.21087	0.18503	0.02258	0.08926	0.26454	0.17724	0.1133
2611	0.1838	0.18164	0.2115	0.18787	0.0213	0.08427	0.26603	0.17262	0.11851
2615.36	0.17817	0.18068	0.21405	0.18246	0.02088	0.08742	0.26544	0.17275	0.11585
2619.72	0.18028	0.17834	0.20817	0.18692	0.02088	0.08803	0.26633	0.17711	0.11631
2624.08	0.19296	0.18015	0.21166	0.18882	0.02282	0.08704	0.26514	0.17429	0.1177
2628.44	0.18239	0.1794	0.20849	0.18814	0.02151	0.08635	0.2635	0.17621	0.11752
2632.79	0.19155	0.18164	0.21389	0.18841	0.0223	0.08934	0.26737	0.17788	0.1188
2637.14	0.18239	0.18271	0.21484	0.1895	0.023	0.08627	0.25949	0.17596	0.11666
2641.48	0.18099	0.18314	0.21198	0.18936	0.02185	0.08727	0.26038	0.17724	0.1177
2645.82	0.18521	0.181	0.21675	0.18787	0.02199	0.08612	0.26365	0.17737	0.12013
2650.16	0.17606	0.1857	0.21294	0.19071	0.02088	0.08658	0.2635	0.1775	0.1159
2654.5	0.18732	0.18634	0.2115	0.1941	0.02241	0.08688	0.2644	0.1766	0.11764
2658.83	0.17394	0.1905	0.21738	0.1987	0.02213	0.08596	0.26068	0.17865	0.11654
2663.16	0.19648	0.18559	0.21564	0.19708	0.0213	0.0878	0.26261	0.17904	0.11943
2667.49	0.1993	0.19136	0.21564	0.18828	0.0223	0.08873	0.2632	0.18353	0.11764
2671.81	0.18592	0.1889	0.21071	0.18557	0.02137	0.08711	0.258	0.17981	0.11967
2676.13	0.20423	0.19402	0.21246	0.19071	0.02237	0.08589	0.26216	0.18906	0.11868
2680.45	0.2	0.19477	0.21325	0.1899	0.0221	0.08589	0.25681	0.18186	0.11822
2684.76	0.17394	0.19349	0.20626	0.18638	0.02237	0.08665	0.2577	0.18148	0.11833
2689.07	0.20915	0.1952	0.21834	0.18489	0.02178	0.08919	0.26112	0.18931	0.11689
2693.38	0.18521	0.19594	0.20769	0.1784	0.02237	0.08704	0.25383	0.18289	0.11747
2697.68	0.18662	0.18954	0.2096	0.18097	0.02199	0.08512	0.25725	0.18174	0.12135
2701.98	0.18873	0.19979	0.21929	0.19139	0.02286	0.08972	0.26172	0.19291	0.11996
2706.28	0.19507	0.20149	0.22533	0.19599	0.02293	0.08957	0.26008	0.19908	0.12025
2710.58	0.19718	0.20811	0.23264	0.19911	0.02303	0.08896	0.26901	0.2037	0.11943
2714.87	0.2162	0.21857	0.23947	0.20533	0.02244	0.09333	0.27347	0.20434	0.12065
2719.16	0.21338	0.22529	0.25473	0.21345	0.02566	0.09594	0.27719	0.2177	0.12534
2723.44	0.22183	0.22636	0.25425	0.23308	0.02795	0.09847	0.28761	0.22027	0.12603
2727.73	0.23521	0.22839	0.256	0.24892	0.03252	0.09548	0.28329	0.229	0.13177
2732.01	0.21972	0.22753	0.24138	0.2458	0.04059	0.09203	0.28121	0.2281	0.13727
2736.28	0.23099	0.22231	0.24217	0.22902	0.04468	0.09172	0.27779	0.2254	0.13744
2740.56	0.21127	0.21131	0.23137	0.20912	0.04132	0.08903	0.26916	0.21269	0.13397
2744.83	0.20352	0.20245	0.2239	0.20005	0.03567	0.08972	0.26916	0.20845	0.1346
2749.09	0.19859	0.19893	0.2212	0.1945	0.03124	0.08803	0.27332	0.20293	0.13009
2753.36	0.18451	0.1905	0.21357	0.18896	0.02836	0.08688	0.26901	0.19497	0.12609
2757.62	0.19437	0.19018	0.21595	0.19613	0.02667	0.08919	0.27198	0.19381	0.12453
2761.88	0.19014	0.18186	0.21405	0.19653	0.02622	0.08642	0.26752	0.18777	0.12349
2766.14	0.17817	0.18356	0.20785	0.20398	0.02591	0.08696	0.26797	0.18726	0.12256
2770.39	0.17746	0.18292	0.20769	0.20926	0.02428	0.08343	0.26931	0.18186	0.12082
2774.64	0.18521	0.1778	0.20976	0.20709	0.02407	0.08573	0.27213	0.18058	0.12082
2778.88	0.18803	0.18132	0.20706	0.1964	0.0241	0.08742	0.27139	0.18302	0.1203
2783.13	0.19507	0.18388	0.20801	0.1922	0.02428	0.08581	0.27689	0.17942	0.12163
2787.37	0.17535	0.18378	0.20674	0.18855	0.02314	0.08642	0.28508	0.17853	0.1199
2791.6	0.19014	0.18794	0.21039	0.19004	0.02404	0.09133	0.28954	0.187	0.12146
2795.84	0.19577	0.18911	0.20992	0.18544	0.02393	0.09003	0.29415	0.18996	0.1221
2800.07	0.18169	0.1937	0.21611	0.19721	0.02514	0.09602	0.30248	0.18816	0.12279
2804.3	0.1831	0.19413	0.21834	0.19126	0.02532	0.10231	0.31156	0.19188	0.12146
2808.52	0.21831	0.19701	0.21961	0.20046	0.02431	0.11398	0.33745	0.19818	0.1243
2812.74	0.21127	0.20427	0.2204	0.20141	0.02649	0.11766	0.35932	0.20524	0.12025
2816.96	0.21127	0.21195	0.22469	0.20533	0.02591	0.12111	0.39801	0.20845	0.12349
2821.18	0.22676	0.21569	0.23836	0.21075	0.02691	0.12096	0.47076	0.22271	0.12575
2825.39	0.23521	0.22956	0.25266	0.2186	0.02826	0.11628	0.56599	0.2326	0.12667
2829.6	0.25423	0.24728	0.27793	0.23714	0.03037	0.12357	0.71835	0.25764	0.13321
2833.81	0.27887	0.28677	0.31607	0.26692	0.03456	0.13524	0.8954	0.29527	0.13848
2838.01	0.35563	0.35646	0.4014	0.32269	0.04097	0.15796	1	0.36758	0.15336
2842.21	0.41408	0.44205	0.49452	0.37223	0.04627	0.17722	0.97649	0.45222	0.16349
2846.41	0.48732	0.54322	0.5673	0.36681	0.04672	0.17645	0.83752	0.55176	0.16355
2850.61	0.57042	0.65912	0.6334	0.34691	0.04672	0.16087	0.67802	0.66221	0.15996
2854.8	0.63169	0.72743	0.65311	0.33297	0.04468	0.14667	0.56599	0.74608	0.15139
2858.99	0.67324	0.74589	0.6431	0.35531	0.04589	0.14506	0.52343	0.77049	0.15365
2863.17	0.71831	0.754	0.67202	0.42786	0.04769	0.16126	0.53444	0.80067	0.1628
2867.35	0.76056	0.77908	0.72112	0.58297	0.05334	0.19211	0.60006	0.83907	0.17634
2871.53	0.81831	0.82487	0.78579	0.78113	0.05718	0.21621	0.64529	0.87542	0.18856
2875.71	0.86127	0.86137	0.82059	0.93841	0.06241	0.22788	0.67192	0.91228	0.19748
2879.89	0.90704	0.90107	0.88797	0.98877	0.06573	0.24776	0.71031	0.9458	0.20529
2884.06	0.9493	0.95912	0.96552	0.97861	0.06965	0.27101	0.76298	0.98793	0.21664
2888.22	0.9662	0.99605	1	0.94153	0.07162	0.28598	0.80464	1	0.2189
2892.39	0.95775	1	0.97346	0.89767	0.06868	0.28283	0.79036	0.99217	0.21293
2896.55	0.93732	0.97898	0.93231	0.89226	0.06667	0.27853	0.74498	0.95723	0.20558
2900.71	0.92817	0.94674	0.87367	0.91635	0.06605	0.29972	0.73203	0.93591	0.19892
2904.87	0.93662	0.94013	0.86843	0.96169	0.06428	0.39827	0.74379	0.93347	0.19794
2909.02	0.94648	0.93917	0.83061	1	0.06785	0.654	0.7487	0.91279	0.1969
2913.17	0.93521	0.93287	0.78023	0.99878	0.06958	1	0.74647	0.88068	0.19365
2917.32	0.95211	0.93212	0.72001	0.99093	0.07304	0.97298	0.73739	0.82648	0.18949
2921.46	1	0.95496	0.70237	0.94789	0.0799	0.64433	0.767	0.79694	0.20228
2925.6	0.99437	0.94354	0.69283	0.90958	0.09327	0.39159	0.80464	0.77858	0.20865
2929.74	0.91972	0.89274	0.67519	0.87723	0.12066	0.27776	0.83648	0.75854	0.2369
2933.88	0.82746	0.80342	0.6361	0.83419	0.18314	0.22419	0.85374	0.7272	0.29057
2938.01	0.73521	0.73255	0.57794	0.7948	0.34938	0.18896	0.87487	0.68572	0.44694
2942.14	0.69296	0.65315	0.52821	0.74147	0.72373	0.16985	0.89808	0.63113	0.78967
2946.27	0.60775	0.59285	0.49785	0.71616	1	0.17116	0.93438	0.57539	1
2950.39	0.59648	0.55464	0.51899	0.70804	0.74638	0.18543	0.94837	0.53789	0.75962
2954.51	0.55775	0.54365	0.54855	0.72469	0.37667	0.20669	0.93468	0.542	0.44242
2958.63	0.54014	0.52689	0.5495	0.75623	0.19249	0.20961	0.86371	0.53853	0.29416
2962.74	0.54648	0.51089	0.53091	0.79223	0.12433	0.21245	0.79571	0.52466	0.23488
2966.86	0.5007	0.4778	0.50024	0.81077	0.09649	0.21268	0.72415	0.48716	0.20992
2970.97	0.45775	0.43042	0.44764	0.77721	0.08471	0.21667	0.65109	0.42872	0.19748
2975.07	0.3993	0.36841	0.38614	0.70005	0.07959	0.22987	0.59589	0.37041	0.18254
2979.18	0.33803	0.31718	0.32369	0.58947	0.07685	0.24929	0.53787	0.30837	0.17779
2983.28	0.2838	0.27908	0.27888	0.49743	0.07903	0.27354	0.50617	0.26445	0.17276
2987.37	0.25423	0.25048	0.25075	0.40972	0.08371	0.28114	0.47389	0.23619	0.17449
2991.47	0.24014	0.23799	0.23137	0.35138	0.09015	0.27408	0.44487	0.21552	0.18017
2995.56	0.25211	0.22903	0.21802	0.30915	0.10002	0.25666	0.42985	0.20665	0.18734
2999.65	0.24225	0.227	0.21294	0.27518	0.1102	0.22895	0.40768	0.19355	0.19667
3003.74	0.23028	0.22721	0.21135	0.25365	0.11699	0.19741	0.38595	0.18777	0.19985
3007.82	0.22887	0.22348	0.20308	0.24161	0.11841	0.16317	0.36914	0.18739	0.20263
3011.9	0.22324	0.208	0.19689	0.21819	0.11155	0.13823	0.34876	0.17557	0.1991
3015.98	0.22042	0.20064	0.19371	0.21075	0.1039	0.12641	0.33685	0.17763	0.18682
3020.05	0.21127	0.19349	0.18878	0.20263	0.09386	0.11359	0.32302	0.16902	0.17988
3024.12	0.2007	0.18794	0.18672	0.19613	0.08291	0.10569	0.3123	0.16684	0.16662
3028.19	0.19225	0.18879	0.18815	0.19099	0.07637	0.10124	0.3062	0.16787	0.16199
3032.26	0.19085	0.18047	0.18846	0.18665	0.06823	0.09863	0.3065	0.16735	0.15591
3036.32	0.18451	0.18036	0.18894	0.19058	0.0639	0.09947	0.30025	0.16864	0.15197
3040.38	0.17887	0.17748	0.18687	0.18692	0.06043	0.09502	0.29519	0.16286	0.14549
3044.44	0.18169	0.17545	0.18973	0.18381	0.05992	0.0964	0.2949	0.16478	0.14543
3048.49	0.19014	0.17791	0.19132	0.18395	0.05704	0.09364	0.29266	0.16787	0.14242
3052.55	0.19718	0.17492	0.19085	0.18679	0.05621	0.09356	0.2888	0.16735	0.14068
3056.59	0.17676	0.17375	0.18989	0.18016	0.05517	0.0918	0.28374	0.16183	0.13912
3060.64	0.17817	0.17118	0.18958	0.18043	0.05652	0.09256	0.28671	0.16132	0.13895
3064.68	0.19718	0.17236	0.19021	0.18408	0.05597	0.09256	0.28642	0.1644	0.13732
3068.72	0.17113	0.16798	0.18401	0.17407	0.05534	0.08942	0.27808	0.16247	0.13721
3072.76	0.16831	0.1682	0.1829	0.17163	0.05271	0.08596	0.27719	0.15425	0.13605
3076.8	0.17113	0.16403	0.17289	0.1673	0.04914	0.08297	0.26841	0.15387	0.13316
3080.83	0.18028	0.15902	0.17146	0.16608	0.04759	0.08251	0.26008	0.15271	0.13223
3084.86	0.16479	0.15923	0.16955	0.16148	0.04471	0.08619	0.26157	0.15014	0.12916
3088.88	0.14789	0.15539	0.16987	0.15999	0.04433	0.08067	0.25725	0.14732	0.12974
3092.91	0.15986	0.15539	0.16876	0.16622	0.04364	0.08005	0.25919	0.14911	0.12858
3096.93	0.15634	0.15251	0.1605	0.15633	0.04274	0.08235	0.25398	0.1486	0.12847
3100.94	0.14366	0.15838	0.16669	0.16567	0.04125	0.07967	0.25472	0.15027	0.12511
3104.96	0.16761	0.15112	0.16193	0.15769	0.03993	0.07928	0.25071	0.14693	0.12453
3108.97	0.1493	0.15422	0.16463	0.16012	0.04014	0.07905	0.25234	0.14526	0.12725
3112.98	0.14155	0.15571	0.16224	0.15931	0.03983	0.07836	0.25026	0.14757	0.12383
3116.99	0.16549	0.15165	0.1597	0.15417	0.03927	0.07675	0.24714	0.14256	0.1225
3120.99	0.15352	0.14781	0.16081	0.15972	0.03785	0.08159	0.24818	0.14141	0.12459
3124.99	0.15352	0.15091	0.16653	0.15958	0.03727	0.07813	0.23732	0.14038	0.11793
3128.99	0.15634	0.14589	0.15811	0.15214	0.03626	0.0779	0.24059	0.13845	0.12094
3132.98	0.14718	0.14707	0.16431	0.15485	0.03675	0.07867	0.24029	0.14256	0.11758
3136.97	0.1507	0.14685	0.15509	0.15214	0.0356	0.07583	0.23746	0.14025	0.11833
3140.96	0.15282	0.15037	0.16065	0.15336	0.0354	0.07706	0.24535	0.14321	0.11729
3144.95	0.13239	0.14792	0.15716	0.15133	0.03276	0.07491	0.23479	0.14051	0.11723
3148.93	0.14859	0.14472	0.15478	0.15295	0.03186	0.07222	0.23404	0.13948	0.11353
3152.91	0.15986	0.14664	0.15636	0.15349	0.03159	0.07506	0.23627	0.13794	0.11561
3156.89	0.1493	0.14504	0.15462	0.14469	0.02999	0.07238	0.22839	0.13627	0.11284
3160.87	0.15282	0.14344	0.1543	0.1516	0.03006	0.07268	0.22943	0.13961	0.11249
3164.84	0.13662	0.14749	0.15827	0.15254	0.02992	0.0746	0.23806	0.13897	0.11289
3168.81	0.14085	0.14536	0.15986	0.15322	0.02895	0.07621	0.2388	0.14128	0.11301
3172.78	0.14789	0.1412	0.15207	0.14469	0.02868	0.06823	0.23151	0.13434	0.11312
3176.74	0.14507	0.14493	0.15875	0.15322	0.02795	0.07161	0.23508	0.14077	0.11376
3180.7	0.15352	0.1445	0.15843	0.15282	0.02677	0.06969	0.23404	0.14128	0.11156
3184.66	0.14085	0.13895	0.1508	0.15268	0.02532	0.07138	0.2336	0.13871	0.11214
3188.62	0.14366	0.13981	0.15112	0.15079	0.02674	0.0703	0.23389	0.13897	0.10913
3192.57	0.1507	0.1412	0.15255	0.15227	0.02528	0.068	0.23047	0.14064	0.11139
3196.52	0.15563	0.13661	0.15668	0.1516	0.02615	0.06869	0.23538	0.13807	0.10913
3200.47	0.1507	0.1397	0.15891	0.15011	0.02501	0.07376	0.24237	0.14372	0.11237
